# Supplementary material
Source: PubMed Central journal article supplement (PMC2918762)
Supplement: cib0303_0227SD1.pdf [file cib0303_0227SD1.pdf]

| Species                | VPEF              | KIAA1033           | Strumpellin       | WASH             | CapZ $\alpha$                                                                                    | CapZ $\beta$      | Ccdc53            |
|------------------------|-------------------|--------------------|-------------------|------------------|--------------------------------------------------------------------------------------------------|-------------------|-------------------|
| <i>M. musculus</i>     | gi 81885787       | gi 126090572       | gi 46048300       | gi 83649760      | CAPZ $\alpha 1$ : NP_033927.2<br>CAPZ $\alpha 2$ : NP_031630.1<br>CAPZ $\alpha 3$ : gi 157951670 | NP_001032850.1    | gi 21313034       |
| <i>H. sapiens</i>      | gi 3043708        | gi 121941472       | gi 20070788       | gi 29387278      | CAPZ $\alpha 1$ : NP_006126.1<br>CAPZ $\alpha 2$ : NP_006127.1<br>CAPZ $\alpha 3$ : gi 15277417  | NP_004921.1       | gi 7705622        |
| <i>X. tropicalis</i>   | ENSXETG0000007484 | ENSXETP00000003997 | gi 52345844       | gi 62857419      | CAPZ $\alpha 1$ : NP_001017324.1<br>CAPZ $\alpha 2$ : NP_001017254.1                             | NP_001093750.1    | gi 62857347       |
| <i>D. rerio</i>        | gi 220679424      | gi 125855266       | gi 41055722       | gi 134024982     | CAPZ $\alpha 1$ : gi 47086649<br>CAPZ $\alpha 2$ : gi 169146111                                  | NP_956229.1       | gi 41055774       |
| <i>D. melanogaster</i> | ND                | gi 24642456        | gi 116875735      | gi 24652907      | NP_611539.1                                                                                      | NP_477005.1       | gi 19920908       |
| <i>C. elegans</i>      | ND                | gi 115534026       | gi 2088794        | gi 17537245      | NP_501145.1                                                                                      | NP_496336.1       | gi 17534593       |
| <i>Capitella sp</i>    | ND                | gi Capca1 2885     | gi Capca1 174521  | gi Capca1 228200 | gi Capca1 163423                                                                                 | gi Capca1 181882  | gi Capca1 6242    |
| <i>L. gigantea</i>     | ND                | gi Lotgi 1 158608  | gi Lotgi 1 177115 | gi Lotgi 1 83296 | gi Lotgi 1 179674                                                                                | gi Lotgi 1 164619 | gi Lotgi 1 106424 |
| <i>M. brevicollis</i>  | ND                | gi Monbr1 15671    | gi Monbr1 34678   | gi Monbr1 22676  | gi Monbr1 32113                                                                                  | gi Monbr1 35636   | gi Monbr1 22818   |
| <i>S. cerevisiae</i>   | ND                | ND                 | ND                | ND               | NP_0122918                                                                                       | NP_012230         | ND                |
| <i>S. pombe</i>        | ND                | ND                 | ND                | ND               | NP_594639                                                                                        | NP_593619         | ND                |
| <i>D. discoideum</i>   | ND                | gi 166810804       | gi 166805849      | gi 16680963      | XP_645243.1                                                                                      | XP_647630.1       | ND                |

Supplementary figure 1. Accession numbers of orthologous genes encoding subunits of the WASH complex. ND: Not Detected.

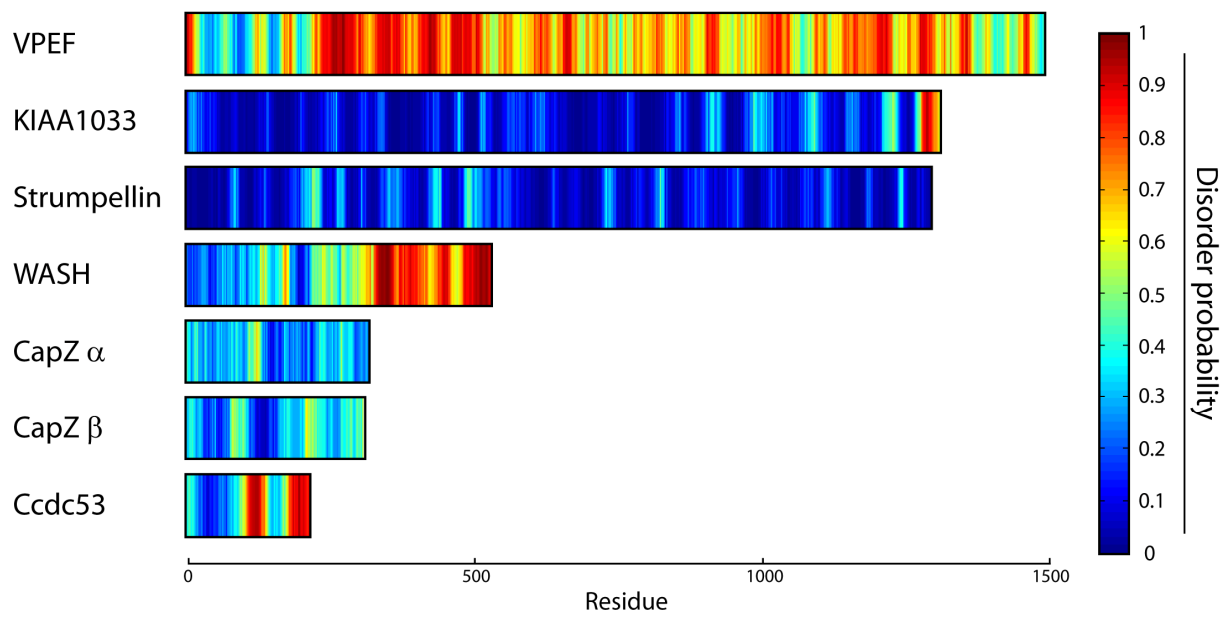

**Supplementary figure 2. Disorder prediction in subunits of the murine WASH complex.** Disorder probability was calculated using the IUPred server (<http://iupred.enzim.hu/>). Disorder probability is color-coded with hot colors representing the highest probability.

```

1      10      20      30      40      50      60      70
Mus_musculus  MNRTSPDSESRPPASEPVWERPWVEERRSSQNSLAADAGLLQFLQEFSQQTISRTHEIKQVDGLIQE
Homo_sapiens  MNRTTPDQELVPASEPVWERPWVEERRSSQNSLAADAGLLQFLQEFSQQTISRTHEIKQVDGLIRE
Xenopus_tropicalis MNGPANGS...AETPVWERPWGLEERRSSQNSLGADAGLLNFLREFSQQTISRTHEIKQVDGLIRE
Danio_riero   .....AEQWVERPWTLEEMQSSTNSLSLAADSGLFFLRDRFSQRMSKTHEIEKQVDGLIRD

80      90      100     110     120     130
Mus_musculus  TKATHCRLHNVFNDFLMLSNTQFIENRVVYDEEVEEQVLKAEA.EK.AEOEKTREOKEIDLIPKVQEAVNY
Homo_sapiens  TKATDCRLHNVFNDFLMLSNTQFIENRVVYDEEVEEPVLKAEA.EK.TEOEKTREOKEVDLIPKVQEAVNY
Xenopus_tropicalis TKATDCRLHNVFNDFLMLSNTQFIENRVVYDEEVEDHVVKADAGNK.FEOEKTREOQEASDLIPKVQEAVNY
Danio_riero   TKATDSRLHVFNDFLMLSNTQFIENRVVYDEEVEDPLPKSETTERQEPEOEKTREOKEASDLIPKVQEAVNY

140     150     160     170     180     190     200
Mus_musculus  GLQVLDSAFEQLDIKAGNSDSEEDDANERVDLILEP.KDLYIDRPLYLIGSRLFMEQDVGLGELSSEE
Homo_sapiens  GLQVLDSAFEQLDIKAGNSDSEEDDANGRVELILEP.KDLYIDRPLYLIGSRLFMEQDVGLGELSSEE
Xenopus_tropicalis GLQVLENAFEQLDIKAGNSDSEEEEVNERVEPLEPKDLYIDRPLLLIGSQQFMQQDVGLGDLSSEE
Danio_riero   GLKVLESAFEQLDIKAGNSDSEEDEVLEKVEPLEA.KDLYVDRPLYLIGSAFMDQDVGLGDLSSDE

210     220     230     240     250     260
Mus_musculus  GSVGSDRGSIVDSEDEKEEESDEDEFASHSDNDQN.....QHTTQISDEEDDDGDLFADSEKEGD
Homo_sapiens  GSVGSDRGSIVDTEEKEEESDEDEFAHHSDNEQN.....QHTTQMSDEEDDDGDLFADSEKEEE
Xenopus_tropicalis GSVDNDRGSIDSEDEKDDEVCLYIYLAYSNCSTSQ.....AHHSTLSDEDDNGSDLFGDSEKEEE
Danio_riero   MSIGSDRDSVLSEDVEDGDEHTDQD...DYSDQDEVQGNFKKKPSIASYNDADEENDDSDLFGGSDKDED

270     280     290     300     310     320     330
Mus_musculus  DIEDIESAKSK...RPTSFADELAARIKGDISNORKEGOT.....DGKPQKTVKEKKERRTPADDEDIL
Homo_sapiens  DIEDIENTRPKRSRPTSFADELAARIKGDAMGRVDEEPTLPSGEAKPRKTLKEKKERRTPSDDEDNL
Xenopus_tropicalis DIIVENAFEDNKTTKRTPTSFADELAARIKGDIPRTQESDSQ.....CGHTLAVLKETQPSIPSDEPEDDF
Danio_riero   .....EDDLRKDTGVP.SFADELAARIKGETQNKPEADRSLSSGPSTTSKKSKTKNVKPQVEDDQDEM

340     350     360     370     380     390     400
Mus_musculus  FPPPTLTDEDFSPFGSRGLFSNGQLFDDEDES.DLFKEAPRARAQAPVSEELPPSPKPGKKIPAGAV
Homo_sapiens  FAPPKLTDEDFSPFGSGGLFSGKGLFDDEDESDLFTEASQDRQAGASVKESSS...KPGKKIPAGAV
Xenopus_tropicalis FKPPKLTDEDFSPFGSGGLFSGKGLFDDDDEVCFSDVTFTFNLVMPLSNKFQHS.....
Danio_riero   FRPPTMEDEEYSPFGSGGLFSGKGLFDDDDEG.DLFSEAPKNVPVEKEKTVAQPAPHKTKKIPTGAV

410     420     430     440     450     460
Mus_musculus  SVLLGHPDVSGSTSAPSLKELQKHGQPTPGKSSHLPTPACLFDDDDNDNDEDDDNFMPSSKSKPS...KTD
Homo_sapiens  SVFLGDTDVFGAASVPSLKEPQKEPTPRKSPYGPPTLFDDDDGDDDD...FFSAPHSKPS...KTR
Xenopus_tropicalis DIIVENVIGS.SILAEKDKNKSTTPTQRKSVPKPPSSLFDDDDGA.....FFGSSNHTTNKPD
Danio_riero   SIFPGNS...LLGSANDSESPKSSDSRSALPKASIG...GLFDDDDDDD...FFSGKTQSKTPGQD

470     480     490     500     510
Mus_musculus  KVKS...TAIIFD.....DEGDFKEKAE...ALPAASVSQTHESKTRADKT.....IAL...PSSKN
Homo_sapiens  KVQS...TADIFG.....DEEGDFKEKAV...ASPEATVSQIDENKAREK.....VTL...SSSKN
Xenopus_tropicalis KSQP...TADLFA.....DDN.DLFQDKPV...APILAKNKVTKENEPPKENN.....IEI...SKNHQ
Danio_riero   KKTPKKTVDLFGEADEDEDDDDTAMFSGKAISALPQDISANGEEETRPPEKKPPAGAVSMFGPGTKN

520     530     540     550
Mus_musculus  L.....KL.....VSETKTQKGLFSDEDESE...DLFSSQ...SSSKPKSA
Homo_sapiens  L.....KP.....SSETKTQKGLFSDEDESE...DLFSSQ...SASNLKGA
Xenopus_tropicalis V.....PVEKSPLE...SSTKKQTKGLFSDEDESESDLFSPIPSASKSKTA
Danio_riero   LEGLKKRRPSTSESTKSESGHAPEVKSSPALGSAEKMQSKSLFSDDEDSQ...IFSSETSKSKPTT

560     570     580     590     600     610     620
Mus_musculus  SLPSSQPPTSVSLFGDEDEDSLFGSAAKKQTSSLQPQSQEKAKPSEQPSKKTSALLFSSDEDQWNIA
Homo_sapiens  SLLPGLPTSVSLFDEDEDEDLFGGTAAKKQTLSLQAQREKAKSELSKKKASALLFSSDEDQWNIP
Xenopus_tropicalis TLPAAKTGKALSLFDEDED...LFASVDPKKQTAPVTKPAQNKLTSEKAPKSG...LFSSDEDPIGTL
Danio_riero   QNKPSKAPLSI...FDEEED...LFSS...PKPVPVKTSLPPKNALSSLF...SDDESQWMSL

630     640     650     660     670     680     690
Mus_musculus  DSHTKLASDNKSKELDWDSGATQGEAKAVKTNLFEDDDDDEVDLFAIAKDSQK...KTQRTSLLFED...DA
Homo_sapiens  ASQHLASDSRSKGEPRDSGTLQSQEAKAVKTSLFEEDKED...DLFAIAKDSQK...KTQRVLSLFED...DV
Xenopus_tropicalis NQKNTVEKTQPAKAAVVSKGTREEPLG...KKSLFDNDTD...DLFAITKESEK...KHNRVSLLFED...DN
Danio_riero   KSSKENEVKPSGMKPSISAPSRLPSVKTHKDGLFDDKDDE...DLFVATNOSSKTSSQRVSLLFED...DD

700     710     720     730     740     750
Mus_musculus  ESGSSLFGLPPTSVPSATTKKEVSVPK...VPLLFSDEESEVPSGVK.....PEDLFVDNARVSPEVG
Homo_sapiens  DSGGSLFGSPPTSVPPATKKKETVSEAPPLLFSDEEEKEAQLGVK.....SVDKKVESAKSLKFG
Xenopus_tropicalis E...GSLFSS...VSTAASTSOAPVNTIVMLCFVLQESKLPDTHALISKKESLLTKPTEGQKSEPE...
Danio_riero   EDKEPLFGF...KTPAIKTPPESKTSGVSLFESTEEDTGPSVVKEKITEEKKPVE...SVPSDDSFVK

760     770     780     790     800
Mus_musculus  SADVASIAOKEGL.....LPASOEAGGPSDIFSSSPL...DKGAKGRTRVLSLFDEDDKVE
Homo_sapiens  RTDVAE.SEKEGL.....LTRSAQETVKHSDLFSSSPW...DKGTKPRTKVLSLFDEDDKME
Xenopus_tropicalis .PPVSVCENKE.....PLQENKKPGEDNLFAASPA...DKHAKIKSKNVLSLFDEDEDF
Danio_riero   KKPAGAVSLFGGIDILGDKQDTIKPKPKQEEIPDDELQKEGPPMESKGTKK...KTALSLFDDDD

810     820     830     840     850     860
Mus_musculus  DE...SSTCAPQDGREK.GLKTDS.....RPKSTGVFQDELLFSHKLQKDNDPDVDLFAGTKIRSSVP
Homo_sapiens  DQ...NIQAPOKEVGK.GCDPA.....HPKSTGVFQDELLFSHKLQKDNDPDVDLFAGTKTKLLEP
Xenopus_tropicalis NH...TDKTITQRIPGKVSSETS.....HKRTGVFQDELLFSQLQKDNDPDVDLFASAKPPSEKP
Danio_riero   DDFSTDEITPAPTASR...STEKNALKEHGPRMKSTGVFQDELLFSQTQRDNDPDVDLFATSPKAPEVP

870     880     890     900     910
Mus_musculus  S.....GSLFGDDEDDDLFSAKTQ...PVVPEKKG.....PLKKDHPV...SLKNQDPLDST
Homo_sapiens  S.....VGSLFGDDDEDDDLFSAKSQ...PLVQEKKR.....VVKKDHSVNSFKNQKHPESI
Xenopus_tropicalis SHTKSSAGMGLFGDDDEDDDLFSTAKPRKPIVSFKQNSLVPFLLCNPYSCRRNHSFILINKCPADS
Danio_riero   QSSAKSVAPTLFGDDDEDDDLFSAKPRKAPKVEKPKKS.....KPKTNEIDRSISS.....

```

```

920      930      940      950      960      970      980
Mus_musculus QGSKEKSTWKTEPAQDSSGLTPFKSREPPSSRIGKI QANLAINPAAQLP TVALQIPG TKPVSE LAFPSSSE
Homo_sapiens QGSKEKGIWKPE...TP... QANLAINPAAQLP TAAASQISEVKPVLPE LAFPSSSE
Xenopus_tropicalis ... VSIKSKGPPSSRIGK L QANLQINPAAQLP GAVPKLAGVRPAIVG ISPP...
Danio_riero ... KAVLALNPAQLLP GAVPRAPG AVSIVIPGLAH...

990      1000     1010     1020     1030     1040     1050
Mus_musculus PGRSHIL ESVPVLPGLSVEA GVSFDLPAQAD TLHSANKSRV KVRGKRRPQ TRAAAR LAAQESSEA...EDVT
Homo_sapiens HRRSHGL ESVPVLPGLSVEA GVSFDLPAQAD TLHSANKSRV KMRGKRRPQ TRAAAR LAAQESSEA...EDMS
Xenopus_tropicalis PLADTMD NSTSPTASTGIQ GVSFESPAQID TLHSANKARPR.NARRRP TRMERK LASQDSGET...ID...
Danio_riero TGLPAAA RTMPDHQGSSEG GVSFDSPALI STL LNANKGRAK GAGKRRPQ TRAAAR LAAQESSEA SGENVVS

1060     1070     1080     1090     1100     1110
Mus_musculus VDRG.PVAQLSSSPVLPNGHQ PLLQPRMA..SGQTSSE...TATAFPW EGGPVLSAAD RSFFVK SRPQTG
Homo_sapiens IPRG.PI AQWADGAI SPNGHRPQL..RAA..SGEDSTEEAL AAAAPW EGGPV.PGVD TSPFAKSLGHSR
Xenopus_tropicalis ... DSGVSP TSHTAATTP ELAQLNSHQQFDSTV SNMKQSL SENDVQSRVN TK...VTTKPLTP
Danio_riero VQKNPEPAMAASLPPFN PVSVP...SALTIPV SAPAPAKSPDEA...VRPKRFLE

1120     1130     1140     1150     1160     1170     1180
Mus_musculus N EADLFD S GDI FPK...SRGSQ SVE GAGVMA..G EPPSH SSGGRKE KSLAF PDLSEG S STE DLFQSVKPR
Homo_sapiens G EADLFD S GDI FST...GTGSQ SVERTKPKAKIA ENPAN PVPVGGKA KSPMFPALGEAS SDD DLFQSAKPK
Xenopus_tropicalis N INDLF G S.DLF AKRSLPPADAS K KQDGPDP..NS SANKPGLGTG T KSPA.SVIDEQNS DDDLFQTVKQK
Danio_riero P TD DLF D SDD L F A T K P V S S K K H I Q T T E E G Q K K V S N T E D V T P S K K D Q A P S I F D ... S H D E D L F A T V K P K

1190     1200     1210     1220     1230     1240
Mus_musculus A A K N R N P F P L L E . . . D E . . E D L F A D P R G . K K N E R K P D S H Q D S V S K T H D I F E D D I F A T E A I K P F P K K R E K G
Homo_sapiens P A K K T N P F P L L E . . . D E . . D D L F T D Q K V . K K N E T K S S Q O D V I L T T Q D I F E D D I F A T E A I K P S Q K T R E K E
Xenopus_tropicalis S V K M P K G A S L V D . . . N E P S D D L F R V S K S O K K V D I K T V Q F K E T K S K A S N I F E D D I F A T E V V K V K T K E K K
Danio_riero S V Q K A K H M P F L D E G G E D S D E D L F G A G K S . K S L E S K . N S K K E A S A V R S D I F O D E V . . . K E P E K A Q K N P K E

1250     1260     1270     1280     1290     1300     1310
Mus_musculus R T L E P N L F D D N I D I F A D L . . T V K P K E . K S K K K V A A K S M F D D D T D D I F S S G L Q A K A S K P K S Q S A E A A S . . E
Homo_sapiens K T L E S N L F D D N I D I F A D L . . T V K P K E . K S K K K V E A K S I F D D D M D D I F S S G I Q A K T T K P K S R S A Q A A P . . E
Xenopus_tropicalis P P S E S N L F D E N V D I F A D L . . T Q K G K E K K A K K K V E P K S I F D D D M D D I F A S G . S V K H T K Q K A K P S E T S A . . E
Danio_riero A S L D A S L F D D V D I F A D L T G T S K P K E K K A K K K V E T K S I F D D D M D D I F S T G T T K P T V K P S S K S K K S Q P I O E

1320     1330
Mus_musculus Q R S E H K V A . S I F D D P L N A F G S Q
Homo_sapiens P R F E H K V S . N I F D D P L N A F G G Q
Xenopus_tropicalis V K S E S N V S . S I F D D P L N V F S K .
Danio_riero P A S T A E T A H N I F D D P L N A F G G N

```

### Supplementary figure 3. Alignment of VPEF orthologs.

Sequences were aligned using MUSCLE (<http://www.drive5.com/muscle/>), and the alignment was rendered using ESPrnt (<http://esprnt.ibcp.fr/ESPrnt/ESPrnt/>).

Mus\_musculus . . . . .MAVDTLSPDWDFDRVDDGSKIHAEVQLKNGYGRFLEEYTSQLRRTEEDALDLSIGDVFDFNLDPIA  
Homo\_sapiens . . . . .MAVETLSPDWEFDRVDDGSKIHAEVQLKNGYGRFLEEYTSQLRRTEEDALDLSIGDVFDFNLDPIA  
Xenopus\_tropicalis . . . . .ETISPDWEFDRIDDGSKIHAEVQLKNGYGRFLEEYTSQLRRTEEDALDLSIGDVFDFNLDPIA  
Danio\_riero . . . . .MAVDSLSPDWEFDRVDDGSKIHAEVQLKNGYGRFLEEYTAQLQTEEDALDLSIGDVFDFNLDPIA  
Drosophila\_melanogaster . . . . .MSPVVEVNFVFMGNDSMA . . . . .P . . . . .  
Caenorhabditis\_elegans . . . . .MTEFNPTSDQILEAKEDVRNEQQELMDELTEHHDHITRFKKNK . . . . .FA  
Capitella\_sp . . . . .MGTVNKEEWTDFDQDGLKIVGEVQLRKYGFLEDFAGQLKTEDEALGESIGDSDWDLTLDPIA  
Lottia\_gigantea . . . . .MASSTDWEFDFDDGSKIHAEVQLKNGYGRFLEEYASQLKTEDEALDLSIGDAWMSLDPIA  
Monosiga\_brevicollis . . . . .MKEFLDTHAQQQLVVDVDAIGDGDWLDLNDPIA  
Dictyostelium\_discoideum MATSYSANNGQNEEYTFDAFEDGSSKLVGEQQLTKLNQFAVDYAAQIWKTEEDALDLELNEVVDINIDPVS

Mus\_musculus LKLLPYEQSSLEELIKTENK . . . . .VLNKVTITVYAALCCETIKKLYEAE  
Homo\_sapiens LKLLPYEQSSLEELIKTENK . . . . .VLNKVTITVYAALCCETIKKLYEAE  
Xenopus\_tropicalis LKLLPYEQSSLEELIKTENK . . . . .VLNKVTITVYAALCCETIKKLYEAE  
Danio\_riero LKLLPYEQSSLEELIKTENK . . . . .VLNKVTITVYAALCCETIKKLYEAE  
Drosophila\_melanogaster . . . . .DRSFEESLV . . . . .ANKPLTTLANLNCQCRNLSRKA . . . . .  
Caenorhabditis\_elegans FADAEAQTAIISLINCEDK . . . . .FVEAYMVTQVKVYQSRKRVFAHY  
Capitella\_sp LQVLPHYEQSVLQLIKTDNK . . . . .LNKVTITVLAALCTELDSLKHEAE  
Lottia\_gigantea LQMLPHYEQTNLNLVKTDNK . . . . .LNKVTITVLAALCTELDSLKHEAE  
Monosiga\_brevicollis LDTPHAEAVVVLVWTEQVSDLSKRHASVSTSVAPSAKTRGLDSIFSKVMATFVALCNEMQLQREAE  
Dictyostelium\_discoideum IYNKPHQLDLTELKVTDHK . . . . .FNKVTITVFSICNQRILKETA

Mus\_musculus TKFYNGLLRYG . . . . .EGATDSMV . . . . .EGDCQIQMGRFVSLFQELSCFVTRCYEVVMNVVHQLAAL  
Homo\_sapiens TKFYNGLLRYG . . . . .EGATDSMV . . . . .EGDCQIQMGRFVSLFQELSCFVTRCYEVVMNVVHQLAAL  
Xenopus\_tropicalis TKFYNGLLRYG . . . . .EGAAESIV . . . . .EGDSQIQMGRFVSLFQELSCFVTRCYEVVMNVVHQLAAL  
Danio\_riero TKFYNGLLRYG . . . . .EGVDSV . . . . .EGESQIQMGRFVSLFQELSCFVTRCYEVVMNVVHQLAAL  
Drosophila\_melanogaster KRFFQALFLFSDPRLDDTLPLPHTHTSEGSAGLEGS . . . . .VRMSSSMDFFCQYFLLNRMIVILQNLWRQTAAL  
Caenorhabditis\_elegans KNIRNMYLFLT . . . . .ABEELMDTDGH . . . . .RINNLVAFIIGNMYCNLLRLS DALTLCEATRSQI  
Capitella\_sp NKFYNALLRYG . . . . .EGTEGESP . . . . .DGRAQIQMGRMPLFQELSCFVTRCYEVVMNVVHQLAAL  
Lottia\_gigantea TKFYNALLRYG . . . . .EGEPEGLE . . . . .EGEAQVQMGRIPLFQELSCFVTRCYEVVMNVVHQLAAL  
Monosiga\_brevicollis EELYAPLHRYG . . . . .EGMHDQAEOQ . . . . .EGDAQLCFAKMLPVLQHLATFTSRVYVVKNVVQPFAMM  
Dictyostelium\_discoideum SKFYSPLTIVFG . . . . .EITGES . . . . .EGDVQIEVQKLLPFMIDL SAFVNR CYS LRNIISQFASI

Mus\_musculus YISNKIGPKIIETTG VHFQTMYEHLG ELLTVLLTLDEITVDNHVTLKDHWTMYKRLKLSV . . . . .HHPNSKFGIQ  
Homo\_sapiens YISNKIAPKIIETTG VHFQTMYEHLG ELLTVLLTLDEITVDNHVTLKDHWTMYKRLKLSV . . . . .HHPNSKFGIQ  
Xenopus\_tropicalis YTSNRNEPKIIETTG VHFQTMYEHLG ELLTVLLTMDEIENHATLKDHWTMYKRLKLSV . . . . .HHPNSKFGIQ  
Danio\_riero YNSSKGATKIIESTG VHFQTMYEHLG ELLTVLLTLDEIENHATLKDHWTMYKRLKLSV . . . . .HHPNSKFAIP  
Drosophila\_melanogaster . . . . .SVSPMDINEVHIFAVFDAMS ELLHEIVVFNEL . . . . .ANQSKISTWMLYKRLMNLNSQSANLELN  
Caenorhabditis\_elegans . . . . .KTSHFFPLKKSASFQVYVHKAIEIMYFAAVDHLAALYPDLGKIFCDFQKRRLK . . . . .KHFLEDTTPA  
Capitella\_sp YSNGKSSPIVMDVSNVHFQVYEHLEITVLTLDSEIENQNMKLEHNTLVKRLKLSV . . . . .KHPNQRPNIP  
Lottia\_gigantea HNSYKSGPKLIDVTD VHFQVYSHMA DLLGVLTITLDSIISNQSFI RDHWMLYKRMVKS V . . . . .RHPDGPKNVP  
Monosiga\_brevicollis YTS . . . . .KISAQTIDPRGVHLLHTVFRNLGNLLMCMATLDELIFQNAL LARHKDHYKRLM KHI . . . . .KSHSQPQT  
Dictyostelium\_discoideum YQSCKNIHTQF . . . . .FKNVHLLQAVYYSN DIFSVLINLDSITITQNTALLSSWGRYLRMLKLSV . . . . .KQEPNKVSVS

Mus\_musculus . . . . .EEKLPKFFKFLK . . . . .LEGQLLDGMIFQACEQQFDSLNGGIVSVSKNSTFAEEFAHSIRSFANVBAKLG  
Homo\_sapiens . . . . .EEKLPKFFKFLK . . . . .LEGQLLDGMIFQACEQQFDSLNGGIVSVSKNSTFAEEFAHSIRSFANVBAKLG  
Xenopus\_tropicalis . . . . .EDKLPKFFKFLK . . . . .LEGQLLDGMIFQCGVEQRFDNPGENVSVSKNSAFAAEFAYNIRTFANVBAKLG  
Danio\_riero . . . . .EEKLPKFFKFLK . . . . .LEGQLLDSMIFQACEQRFNDNPGENVSVSKNSAFAAEFAYNIRTFANVBAKLG  
Drosophila\_melanogaster GLSTSLMDIENLITKDFRILLDNLM . . . . .ELKQF . . . . .GLNSVSPITQHSNAY . . . . .IRROLLDVADNPS  
Caenorhabditis\_elegans . . . . .QRKAYDEGARAEADAQSMILK . . . . .NCFRTLYES . . . . .SGGDMNLLNFANEMKEAIGDLLTWSV . . . . .KTS  
Capitella\_sp . . . . .DEKLRPFKFLM . . . . .LEGQLLDGPIQNCVEQIFDQ . . . . .GQMLVTKNLSLFAEEFALNIRSYLSELPRFLG  
Lottia\_gigantea . . . . .EEKLRPFKFLMS . . . . .LEGQLLDGMIFQNCVEQIFDQ . . . . .NTINCSKNPNLAAEFAINIKDLVLEBGRIG  
Monosiga\_brevicollis . . . . .REQMPFFKFLKI . . . . .LEGQLDGMIFQRCVDFD . . . . .DTVMVSPNTILOGEFLELRLNLAALBARV  
Dictyostelium\_discoideum GE . . . . .EDKLWQLEKLLS . . . . .LKQLLLEGFIQSCIQEFDFF . . . . .GVIDVKGKLVLKAEEFYQNVKLVLSMFGTKIM

Mus\_musculus EPSRIDQRDKYVGI CGFLVLFHQIFRT . . . . .VDKFFYKSLDICKKVPATITLTAANIWFNDNFI IHKMPAAAK  
Homo\_sapiens EPSRIDQRDKYVGI CGFLVLFHQIFRT . . . . .IDKFFYKSLDICKKVPATITLTAANIWFNDNFI IHKMPAAAK  
Xenopus\_tropicalis EASRIDQRERYVGLCGFLVLFHQIFRT . . . . .VDKFFYKSLDICKKVPATITLTAANIWFADHFI IQKVPAAAK  
Danio\_riero EPSRIDQRDKYTVGCGFLVLFHQIFRA . . . . .VDKFIYKSLDICKKVPATITLTAANIWFADHFI IHKMPAAAK  
Drosophila\_melanogaster NELKNYEDPKKHILRLTFVVVYVHLEGLIQMEGSLKNNVLDLVARHKQVPLNRSVFWPSSGFLRLAKLTLMK  
Caenorhabditis\_elegans AQTTRDGRF . . . . .FCGISALTYVYHHPNFVBTGLLIRKVVQAASKVYVYRMLGEEVLFVPMFEFSREISNKNKI  
Capitella\_sp . . . . .ETNEVNHHRHSLVGTIALYVLFHQIFRVR . . . . .IDKFIKQFWDLYKKIPGVWLLGISIINWPNEFQSRKLPHMAK  
Lottia\_gigantea . . . . .ENNEIDHRYKFFVGVCGFLYILHFQIFRV . . . . .VDKFLFQKLVWDFIYKKIPCWHMGNVWVPMFEFQFRLPNIDQ  
Monosiga\_brevicollis . . . . .TPKDRRRNDFMGLVCNYILFETIFRS . . . . .QDRRMLKSIWDLQKLPVAVHVIYGTIVVMPNDNFI IQLKLPHLKA  
Dictyostelium\_discoideum . . . . .DSSLNLRERFPGFMLYAFYIALFKDITDKSFFKQVWVETKRVPMSLVNVVWFVFPADFI IQLKLPGMK

Mus\_musculus . . . . .LDLDRK . . . . .SLQAIKIHRDTP LQQKAQSLNKDVQSSYVYFVSSWMMKMESE . . . . .LSKEQRMDTFABEDLT  
Homo\_sapiens . . . . .LDLDRK . . . . .SLQAIKIHRDTP LQQKAQSLNKDVQSSYVYFVSSWMMKMESE . . . . .LSKEQRMDKFAEDLT  
Xenopus\_tropicalis . . . . .LIDKK . . . . .SLQAIKIQRDSYLP LQQKAQSLNKDVQSSYVYFVSAWMMKMESE . . . . .LSKEQRKAEKFAEDLT  
Danio\_riero . . . . .LMDKK . . . . .SLQSI RSRSDVFLQQAQTLMKMDQSSYVYFVTSWMMKMESE . . . . .LSKEPKDKLSDELS  
Drosophila\_melanogaster . . . . .SSARS . . . . .QDGGPKVHSTVLEKFRSDQRTICQGLVQLSLWSIQMQRV . . . . .FD . . . . .VGVFGLK  
Caenorhabditis\_elegans . . . . .FDSKTEIFAKKLVEEASSISKDRADEMPLKEVKEYCEHASTWMLFQQKRRDQTEAITKLPOWGLDVSELN  
Capitella\_sp . . . . .ALDKK . . . . .ALQTAGQARLWQKKN . . . . .LVSEAQSWYVSVTSWMMKMESE . . . . .FS . . . . .GTGALVDDL  
Lottia\_gigantea . . . . .LDRK . . . . .AQLAVQTQTTW LQQKQLLRDIQVYSTQVSAWMMKMESE . . . . .LA . . . . .RGGTLMEDLN  
Monosiga\_brevicollis . . . . .LVDKK . . . . .FAQRPWDRPHAHAFAGHRLTRSEAQNIYRRVVAWVQFDACK . . . . .FR . . . . .PEMSDMELE  
Dictyostelium\_discoideum . . . . .IVGST . . . . .FNHM . . . . .EIRRDYLRNVDKFESGRVKSYYL VSRWMMKMESE . . . . .QT . . . . .RGGTLVWVSL

Mus\_musculus . . . . .NR CNVFIQGF LLYAYS ISTIKKTMLNLYMSMQKPMTKTSVKALCRLVELLKAIEHMFYRRSMVVAADVSHI  
Homo\_sapiens . . . . .NR CNVFIQGF LLYAYS ISTIKKTMLNLYMSMQKPMTKTSVKALCRLVELLKAIEHMFYRRSMVVAADVSHI  
Xenopus\_tropicalis . . . . .NR CNVFIQGF LLYAYS ISTIKKTMLNLYMSMQKPMTKTSVKALCRLVELLKAIEHMFYRRSMVVAADVSHI  
Danio\_riero . . . . .NR CNVFIQGF LLYAYS ISTIKKTMLNLYMSMQKPMTKTSVKALCRLVELLKAIEHMFYRRSMVVAADVSHI  
Drosophila\_melanogaster . . . . .TFLOLLLNHSHYADQVNLLAVALLNHRVALLMTPMTRNDWIVVSRLLQYLKVIQKTFESNQIFRVRFVTSLS  
Caenorhabditis\_elegans . . . . .LKCIRILETI . . . . .TRDLYLLLRSKRGEHDHFRIEIDRNSAYALIRA IETVKRLEHLPVLDNWSITIEGSEFLA  
Capitella\_sp . . . . .HRCLRFIQGLLYAYNLQHLKLTMLNHLIDLRKPMTRTSVLAALCRLIAELKAIETHFRRSMLVAESVNH  
Lottia\_gigantea . . . . .NRVAVLFIQGLLYACNLHLIRTVLNLHVALQKPMKTAVLSLCKLVELLKAIEHMFYRRSMVVAADVSHI  
Monosiga\_brevicollis . . . . .AQSNFLLQGLLFAVQLRHLLTFLVLHAELOVKLNSAHVREVLRLAQLLKAIEHMFYRRSMLVAEIQS  
Dictyostelium\_discoideum . . . . .SKVGIQVQLSYHLSHLKLTMLNHLIDLRKPMTRTSVLAALCRLIAELKAIETHFRRSMLVAEIQS



510 520 530 540 550 560 570  
Mus\_musculus T O H L Q H Q A L S S I S V A K K R V I S D K K Y S E Q R L D V . . . L S A L V L A E N T L N G P S T K Q R R L I V S L A L S V G T Q M K T  
Homo\_sapiens T O H L Q H Q A L H S I S V A K K R V I S D K K Y S E Q R L D V . . . L S A L V L A E N T L N G P S T K Q R R L I V S L A L S V G T Q M K T  
Xenopus\_tropicalis T O H L Q H Q A L A A T A V A K K R V I S D K K Y S E Q R L D V . . . L S A L V L A E N T L N G P S T K Q R R L I V S L A L S V G T Q M K T  
Danio\_riero T O Q L Q S Q A L V S I S M A K K R V I S D K K Y S E Q R L D V . . . L S A L V L A E N T L N G P S T K Q R R L I M S L A L S V G T Q M K T  
Drosophila\_melanogaster I Q W Q K Q K V I H L L H T T K K K I V V . L K L L O R K I N F . . . L A T I K L A E K S I M G P S K O R L T F V N L A L G E F L D N R L  
Caenorhabditis\_elegans R Q Q W R K H M L R I L S E A R K S Y V S K S K N I S V I E A A T K R S F Y H I A E A Q C I N E M I P S R N V V L G L A Y E I G R L E T H  
Capitella\_sp I O H L S F I A L S T V Q T A K K R I V A D R K Y N E K K L D V . . . L S A L F M A E N C L H G P G T K E R R L I I O L A L A V A M Q L K V  
Lottia\_gigantea I O H L C F N A L S S I A L A K K R I S D K K Y S E R R L D V . . . L S A L V L A E T A L H G P G S K E R R L I L K L A L S V G T K M K A  
Monosiga\_brevicollis G O H L A Q T C T N L V T Q A Y D Q S T K R A N L F P R E L D V . . . Q S A L E L L R R C C I G P S T R L R K L A C E V A V H I A T G S K Q  
Dictyostelium\_discoideum V Q L T D I I N E K L N V V R S K Y A G R S N Y S E I E L D V . . . I V A L S L C S D L L C G V A T N E R I T V V R L C L N V I Y Q S N I

580 590 600 610 620 630  
Mus\_musculus F K D E E L F P L Q V V M K K L D L I S E L R E R V Q A Q C D . . . C C F L Y W H R A V F P I Y L D D V Y E N A V D A A R L H Y M F S A L  
Homo\_sapiens F K D E E L F P L Q V V M K K L D L I S E L R E R V Q T O C D . . . C C F L Y W H R A V F P I Y L D D V Y E N A V D A A R L H Y M F S A L  
Xenopus\_tropicalis F K D E E L F P L L L V M K K L D L I S E L R E R V R S O C N . . . C C F L Y W H R A V F P I Y L D D V Y E N A V D A S R L H Y M F S A L  
Danio\_riero F K D E E L F P L Q L V L K K L D L I S E L R E R V K V C D . . . C G F L Y W H R V T F P I Y L D D V Y E N A V D A A R I H Y M F S A L  
Drosophila\_melanogaster L P A D N Q K L I K S I L H R V S I S D I M R N I G Q L A N T S E S S L V Y N H W F L D T S V L K E Y T R L Q R N P S Y L Q N L V S V S  
Caenorhabditis\_elegans I S S P N R K Q V Q D L M N R L E T F N S P L R L G K Q A A F . . . T G L L L S H S W L P H M Y F D A L T Y R K P D V S I E G F S A L  
Capitella\_sp F K D E E L A S L Q G V L L K L D V I C D I R E R L R E A C D . . . C S F F Y W H Q V I L P I Y F N D L F E T A V D I H K I H Y M F G V L  
Lottia\_gigantea F K D D E L N T L A E T L R K L D A I C E F R E K V R Q A C D . . . C S F I Y W H R V I L P L Y L T D L C N V T D T H R I H Y M F T A I  
Monosiga\_brevicollis F P P A H V E K F L R T R E R L D M H S L R D E I N R A C D . . . A S F F Y W H R H L F G L Y L R D M Y R E P L E A Y R L P Y M M A T L  
Dictyostelium\_discoideum L K E N D I E E L R L H I K R L F E I S D I G K I V K A S C D . . . C S I L F W S R D L F P T Y L Q F L Y Q N P S Q A T S L Q Y T L T G L

640 650 660 670 680 690 700  
Mus\_musculus R D C V P A M H S R H L E S H E I . L L D C Y D K E I M D I L N E H L L D K L C K E I E K D L R L S V H T H L . . . K L D D R N P F K V  
Homo\_sapiens R D C V P A M H A R H L E S Y E I . L L D C Y D K E I M E I L N E H L L D K L C K E I E K D L R L S V H T H L . . . K L D D R N P F K V  
Xenopus\_tropicalis W S C V P D M M Q A R H L E S Y E V . L L D C Y D K E I M A V M T E H L L D I L C K E I E K D L R L S V H T H L . . . Q L D E R N P F K I  
Danio\_riero R D C V P T M L H A K H M E S C Q . L L E C Y D T E I M E I L N E H L L D K L C K E I E K D L R L S V H T H L . . . K L D D R N P F K V  
Drosophila\_melanogaster H H L D K I M A M F R G S R C P K O . . . . . S A N D L I E F L S N H L E F F L R V E A L S H L . . . F Q S Q D P F F Q Q  
Caenorhabditis\_elegans G G F . . . M E G A K I T Q G S M Q . I L T K L E T I M . . . N T L I V K M G A I D L D L R I Q A N T H L A V G K T E Q D G A P . D E  
Capitella\_sp R D C V Q P M T R T K H H E N P K I . L L E S P D R E V I M K N L N E H L L S P L C R D I E T D L R I H T H L . . . Q L D D R N P F K T  
Lottia\_gigantea K D C V S P M L R V K H L P D S T E . L L T V P D K E I M A F L N D N L I D P L C R Y I E T D L R I H Q H L . . . Q L D D R N P F K V  
Monosiga\_brevicollis Q D C . . A I V A K R A Q D S T G E P I L T E L H K E I F A E L Q Q H I I E P L C L D I E D L R F Q A L T D A V H R R D K E S R N P L K A  
Dictyostelium\_discoideum K D V V S V L D K A I H V D N A K Q R L I D V Y R N E M E M I D K N I I Q P L G K D V E T D L R H I H A F L . . . N I E E K D P F K T

710 720 730 740 750 760 770  
Mus\_musculus G R K D L A L F F S . L N P I R F F N R F I D I R A Y V T H Y L D K T F Y N L T T V A L H D W A T Y S E M R N L A T Q R Y G L V M T E A H L  
Homo\_sapiens G M K D L A L F F S . L N P I R F F N R F I D I R A Y V T H Y L D K T F Y N L T T V A L H D W A T Y S E M R N L A T Q R Y G L V M T E A H L  
Xenopus\_tropicalis G M K D L A H F F S . V K P I R F F H R F I D I K A F V T H Y L D K T F Y N L T T V A L H D W A T Y S E M R N L A T Q R Y G L T M T E P H L  
Danio\_riero G M K D L A H F F S . L K P I R F F N R F I D I K A Y V T H Y L D K T F Y N L T T V A L H D W A T Y S E M R N L A T Q R Y G L V M T E A H L  
Drosophila\_melanogaster S A L D Y R L C I N . A V A V E N D G D Y N I . L K D H L E N Y F T A T F Y N L T T A P H D W K S Y E K M R L A N K V L Q P I D D H L  
Caenorhabditis\_elegans E M E Y F G Y L I K T V Q K F Q V A T T V I P A S L H S W L E H W Y S L E I L A P N N A K V Y T R M Q Q I A K R K Y G L L D L P D L  
Capitella\_sp K V K D L T S F L R . M R P I R F F D R N I N I K A H V F D R N I N I K A H V F D R N I D E T F Y N L T V A L H D W K T Y G E M R A L A H R K Y G L D L M E V H L  
Lottia\_gigantea G I K D L S H L K . I R P I R F F D R Y I N I R A L V E S Y L S K T F Y N L T T V A L H D W K T Y G E M R N M A Q Q Y G L N L V E P H L  
Monosiga\_brevicollis Q T K D L V H F L R . L N P L R F G D M L N I K R E V T H Y L D R T F Y N L T T V S L S L W A N Y A K M R S V A A I Y K G L D M Q T H L  
Dictyostelium\_discoideum G I K E F G K F L E . L K P L R F P D R T I D I K S R I S H Y L D Q T F Y N L N T V A L F D W K T Y S E M R N L A T Q R Y G L Q L E V H L

780 790 800 810 820 830 840  
Mus\_musculus F S Q T L E Q G L D V L E I M R N I H I F V S R Y L Y N L N N Q I F I E R T S N N K H L N T I N I R H I A N S I R T H G G I M N T V N F  
Homo\_sapiens F S Q T L E Q G L D V L E I M R N I H I F V S R Y L Y N L N N Q I F I E R T S N N K H L N T I N I R H I A N S I R T H G G I M N T V N F  
Xenopus\_tropicalis F S Q T L E Q G L D V L E I M R N I H I F V S R Y L Y N L N N Q I F I E R T S N N K H L N T I N I R H I A N S I R T H G G I M S T V S K  
Danio\_riero F S Q T L E Q G L D V L E I M R N I H I F V S R Y L Y N L N N Q I F I E R T S N N K H L N T I N I R H I A N S I R T H G G I M N T V N F  
Drosophila\_melanogaster F N Q I I D Q G I D V L Q I M R N I H T F A S S Y A Y N M L Q V F V E T N S R S K H L D I G T R H V A N S V Q T H G G I N T V N F  
Caenorhabditis\_elegans P O S I D E T V A I M D L Q N P T H F V T N Y Q Y F S Q Y L F I E K A S D S K L H V I R L E D F K T A L R K H G W G I L P T A I N A  
Capitella\_sp F S Q T L E Q G L D V L E I M R N I H I F V S K Y L Y N L N N Q I F V E R S S N N K H L N T I N I R H I A N S I R T H G G I M N T V N F  
Lottia\_gigantea F S Q T L E Q G L D V L E I M R N I H I F V S K L Y N L N N Q I F I E K T S N N K H L N T I N I R H I A N S I R T H G G I M N T I N F  
Monosiga\_brevicollis F S Q T L E Q G L D V L E I M R N I H I F V S R Y N Y N L N N Q I F V Q K S S P N K H L N T I N I Q H I A N S I R T H G G I M N T V N F  
Dictyostelium\_discoideum F E S T L E Q G L D V L E I M R N I H I F V S R Y N Y N L N N Q I F I Q R S S N S K H L N T I N I T H I A N S I R T H G G I M N T I N F

850 860 870 880 890  
Mus\_musculus T Y Q F L . K K K F Y I F S Q F M Y D E H I K S R L I K D I R F F R E I K D Q N . . D H K . Y P F D R A E K F N R G I R K L . . . . .  
Homo\_sapiens T Y Q F L . K K K F Y I F S Q F M Y D E H I K S R L I K D I R F F R E I K D Q N . . D H K . Y P F D R A E K F N R G I R K L . . . . .  
Xenopus\_tropicalis G S Y W L G R E R L K G A Q V P L M S N A S Q A L R T I L K D I R F P H A I W N O N S R Y K . . Y P F E R A E K F N R G I R K L . . . . .  
Danio\_riero T Y Q F L . R K K F Y I F S Q F M Y D E H I K S R L I K D I R F F R E T K D Q T . . D Q K . Y P F E R A E K F N R G I R K L . . . . .  
Drosophila\_melanogaster I Y Q F L . R Q K F Y T F S T F L H D E Q I K S R L K L E L R F H T E H K H S . . S Y Q S . Y P Y E R A S V L F K K I R R L . . . . .  
Caenorhabditis\_elegans A Y Q F I . R N K I Q T F L S F L S E T V R C Q V L K L H E M E A N K S S P D G K K S Q Y K A S W A N F L K N L A R H Q M V G A Q G  
Capitella\_sp T F Q F L . R K K F F T F S Q F M Y D E H I K S R L I K D W R F F K E N H L Q T . . D Q K . Y P F D R A D K F N R G I R K L . . . . .  
Lottia\_gigantea T Y Q F L . R K K F Y I F S Q F M Y D D H I K S R L I K D W K F F R E N H M Q T . . D Q K . Y P F E R A D K F N R G I R K L . . . . .  
Monosiga\_brevicollis T Y Q F L . R K R F F T F S Q F L F D D H I K S R L L K D C R F F R E N R D E L . . D Q K . Y P F E R A E K F N R G I R K L . . . . .  
Dictyostelium\_discoideum A Y R F L . V Q K F S I F S E F L F D D Q I K S K L Y K N I K Y F R E N K E Q L . . N N M . Y P S E L V T E L E R D I R Q L . . . . .

900 910 920 930 940  
Mus\_musculus . . . . . G I T P E G Q . . . . . S Y L D Q F R Q L I S Q T G N A M G Y I R M I . . . . . R S G G L H C . . . . . S S N A I R F V  
Homo\_sapiens . . . . . G I T P E G Q . . . . . S Y L D Q F R Q L I S Q T G N A M G Y V R M I . . . . . R S G G L H C . . . . . S S N A I R F V  
Xenopus\_tropicalis . . . . . G L T P D G Q . . . . . S Y L D Q F R Q L I S H I G N A M G Y V R M I . . . . . R S G G L H C . . . . . C S N A I R F V  
Danio\_riero . . . . . G L T P D G Q . . . . . S Y L D Q F R Q L I S Q T G N A M G Y V R M I . . . . . R S G G L H C . . . . . C S A I R F V  
Drosophila\_melanogaster . . . . . C C S S N G E . . . . . T Y M D L F R K V I T Q V G N A V G Y V R L L . . . . . Q A G S K N A . . . . . N F R N R S Y K  
Caenorhabditis\_elegans A H V G G S T N G S A T A S A A A A N E M L Y T Y F D K F R L I I T Q T G N A I S L V R M L C Q A A R E N G L T R Q D L F P Q V K K Y I  
Capitella\_sp . . . . . G L T P D G S . . . . . S Y L D Q F R L I G Q T G N A M G Y I R M I . . . . . R S G G L H C . . . . . S S N A I R F V  
Lottia\_gigantea . . . . . G M T P D G S . . . . . S Y L D Q F R T L I S Q T G N A M G Y I R M I . . . . . R S G G L H C . . . . . C S N A I R F V  
Monosiga\_brevicollis . . . . . G V K A D G R . . . . . T Y L D R F R E L I T E I T G N M A Y I R M I . . . . . R S G G L N M . . . . . C S N S I R F L  
Dictyostelium\_discoideum . . . . . G V S E T G L . . . . . T F L D H F R L I T H I G N A M G Y I R L V . . . . . R S G G L H Y . . . . . C S N A T K F V

950 960 970 980 990 1000  
Mus\_musculus P D L E D I V S F E E L V K E E G L A E . E T L R A A R H L D S V L S D H T R N S A E G T E Y F K M L V D V F A . . . . . P F E R R P K N I  
Homo\_sapiens P D L E D I V N F E E L V K E E G L A E . E T L K A A R Q L D S V L S D L T R N S A E G T E Y F K M L V D V F A . . . . . P F E R R P K N I  
Xenopus\_tropicalis P D L E D I V N F E E L V K E E G L S E . E T Q A A R Q L D S V L S D L T S N S A E G T E Y F K M L V G V F A . . . . . P F E R S A K N I  
Danio\_riero P D L E D I V N F E E L V K E E G L S E . E T Q R A S S Q L D C V L S D L T S N S A E G T E Y F K M L V G V F A . . . . . P F E R S I K N M  
Drosophila\_melanogaster T R F D S . . . . . N F S . . . . . C G S K V H E . A T E G S I R E Y E K S L G H M K E C Y S D S T N Y F K L L L Q E F Q . . . . . P F L C N P H N H  
Caenorhabditis\_elegans D L L E S N T R S L I F T N R P D C P I N S T K M H A A Y L G L V K E M F E R V A E H R N Y F K M M C V F E K S L L M R S K L P E D R V Q  
Capitella\_sp P D L E D I I A F E E L C K E D G L S T . E C Q K A A R Q L E D I I S N L S K N F A B G T E Y F K M L V D V F S . . . . . P F E R D A K N M  
Lottia\_gigantea P D L D D I I S F E E L C T E A G E S P . E C T S A A K N L D M V I N N L A K N F A B G T D Y F K M L V D V F S . . . . . P F E R N P K N M  
Monosiga\_brevicollis P D V T D V S F V E M L E A G A P E D . E T L Q A A R N L D A V V N D L V Q R F A E G S D Y F K M L V D V F A . . . . . K E F R A D K N A  
Dictyostelium\_discoideum P D L K K I P K F Q D L T S K D A L S P . E T T Q A S T N L D A V I H N L S N N L S E G T E Y F K M L V N V F A . . . . . T F E R N I A N Q

|                          | 1010 | 1020    | 1030 | 1040  | 1050  | 1060  | 1070  |
|--------------------------|------|---------|------|-------|-------|-------|-------|
| Mus_musculus             | HLRN | FYITVPP | FLN  | FVEHS | ISCKE | KLNNK | KLGA  |
| Homo_sapiens             | HLRN | FYITVPP | FLN  | FVEHS | ISCKE | KLNNK | KLGA  |
| Xenopus_tropicalis       | HLRN | FYITVPP | FLN  | FVEHS | ISCKE | KLNNK | KLGA  |
| Danio_rerio              | HLRN | FYITVPP | FLN  | FVEHS | ISCKE | KLNNK | KLGA  |
| Drosophila_melanogaster  | HLDY | FHGI    | IPAL | TLN   | FVEHS | ISCKE | KLNNK |
| Caenorhabditis_elegans   | HLRN | FYITVPP | FLN  | FVEHS | ISCKE | KLNNK | KLGA  |
| Capitella_sp             | HLRN | FYITVPP | FLN  | FVEHS | ISCKE | KLNNK | KLGA  |
| Lottia_gigantea          | HLRN | FYITVPP | FLN  | FVEHS | ISCKE | KLNNK | KLGA  |
| Monosiga_brevicollis     | HLRN | FYITVPP | FLN  | FVEHS | ISCKE | KLNNK | KLGA  |
| Dictyostelium_discoideum | HLRN | FYITVPP | FLN  | FVEHS | ISCKE | KLNNK | KLGA  |

  

|                          | 1080          | 1090       | 1100         | 1110      | 1120       |
|--------------------------|---------------|------------|--------------|-----------|------------|
| Mus_musculus             | SVREKYLKEIRAV | AKQQNVQSTS | QDEKLLQTMNLT | QKRLEVYL  | QEFEL      |
| Homo_sapiens             | SVREKYLKEIRAV | AKQQNVQSTS | QDEKLLQTMNLT | QKRLEVYL  | QEFEL      |
| Xenopus_tropicalis       | SVREKYLKEIRAV | AKQQNVQSTS | QDEKLLQTMNLT | QKRLEVYL  | QEFEL      |
| Danio_rerio              | SVREKYLKEIRAV | AKQQNVQSTS | QDEKLLQTMNLT | QKRLEVYL  | QEFEL      |
| Drosophila_melanogaster  | TITQHLNAERS   | KVRDILAGQ  | QRTAPEQL     | DEKLHQTVA | ITERHVNAYE |
| Caenorhabditis_elegans   | SVREKYLKEIRAV | AKQQNVQSTS | QDEKLLQTMNLT | QKRLEVYL  | QEFEL      |
| Capitella_sp             | SVREKYLKEIRAV | AKQQNVQSTS | QDEKLLQTMNLT | QKRLEVYL  | QEFEL      |
| Lottia_gigantea          | SVREKYLKEIRAV | AKQQNVQSTS | QDEKLLQTMNLT | QKRLEVYL  | QEFEL      |
| Monosiga_brevicollis     | SVREKYLKEIRAV | AKQQNVQSTS | QDEKLLQTMNLT | QKRLEVYL  | QEFEL      |
| Dictyostelium_discoideum | SVREKYLKEIRAV | AKQQNVQSTS | QDEKLLQTMNLT | QKRLEVYL  | QEFEL      |

  

|                          | 1130               | 1140          | 1150          | 1160      | 1170 |
|--------------------------|--------------------|---------------|---------------|-----------|------|
| Mus_musculus             | LYFSLSSARIFFRADKTA | AEEENQEKKEKEE | ETKTSNGDGPES  | TVSADPVVK |      |
| Homo_sapiens             | LYFSLSSARIFFRADKTA | AEEENQEKKEKEE | ETKTSNGDGLSDS | TVSADPVVK |      |
| Xenopus_tropicalis       | LYFSLSSARIFFRADKTA | AEEENQEKKEKEE | ETKTSNGDGLSDS | TVSADPVVK |      |
| Danio_rerio              | LYFSLSSARIFFRADKTA | AEEENQEKKEKEE | ETKTSNGDGLSDS | TVSADPVVK |      |
| Drosophila_melanogaster  | LYFSLSSARIFFRADKTA | AEEENQEKKEKEE | ETKTSNGDGLSDS | TVSADPVVK |      |
| Caenorhabditis_elegans   | LYFSLSSARIFFRADKTA | AEEENQEKKEKEE | ETKTSNGDGLSDS | TVSADPVVK |      |
| Capitella_sp             | LYFSLSSARIFFRADKTA | AEEENQEKKEKEE | ETKTSNGDGLSDS | TVSADPVVK |      |
| Lottia_gigantea          | LYFSLSSARIFFRADKTA | AEEENQEKKEKEE | ETKTSNGDGLSDS | TVSADPVVK |      |
| Monosiga_brevicollis     | LYFSLSSARIFFRADKTA | AEEENQEKKEKEE | ETKTSNGDGLSDS | TVSADPVVK |      |
| Dictyostelium_discoideum | LYFSLSSARIFFRADKTA | AEEENQEKKEKEE | ETKTSNGDGLSDS | TVSADPVVK |      |

  

|                          |        |
|--------------------------|--------|
| Mus_musculus             | .....  |
| Homo_sapiens             | .....  |
| Xenopus_tropicalis       | .....  |
| Danio_rerio              | .....  |
| Drosophila_melanogaster  | .....  |
| Caenorhabditis_elegans   | .....  |
| Capitella_sp             | .....  |
| Lottia_gigantea          | GSSVGA |
| Monosiga_brevicollis     | .....  |
| Dictyostelium_discoideum | .....  |

**Supplementary figure 4. Alignment of KIAA1033 orthologs.**

Sequences were aligned using MUSCLE (<http://www.drive5.com/muscle/>), and the alignment was rendered using ESPript (<http://esprict.ibcp.fr/ESPript/ESPript/>).

|                          |         |       |       |        |        |         |        |
|--------------------------|---------|-------|-------|--------|--------|---------|--------|
|                          | 1       | 10    | 20    | 30     | 40     | 50      | 60     |
| Mus_musculus             | .MLDFLA | ENNL  | CGQA  | ILRIVS | CGNAT  | IAEVLRL | SEFIP  |
| Homo_sapiens             | .MLDFLA | ENNL  | CGQA  | ILRIVS | CGNAT  | IAEVLRL | SEFIP  |
| Xenopus_tropicalis       | .MVDFLA | ENNL  | CGQA  | ILRIVS | CGNAT  | IAEVLRL | SEFIP  |
| Danio_riero              | .MVDFLA | ENNL  | CGQA  | ILRIVS | CGNAT  | IAEVLRL | SEFIP  |
| Drosophila_melanogaster  | ..MSFLD | DNNA  | CQGN  | LLNIVS | VGNST  | IABTLRL | KDVYPS |
| Caenorhabditis_elegans   | .....M  | TEENI | FLSKL | LHGES  | TALAEI | RRLSS   | SPFKDF |
| Capitella_sp             | .MVDFLA | ENNL  | CQGN  | TLRIVS | RGNAT  | IAEVLRL | ADFP   |
| Lottia_gigantea          | .MADFLA | ENNL  | CQGN  | ILRIVS | RGNAT  | IAEVLRL | ADFP   |
| Monosiga_brevicollis     | .MATLLD | EKNQ  | CQGN  | LLRMTS | RGNAT  | IAEVLRL | ADNVP  |
| Dictyostelium_discoideum | MVKEFLG | EGSQA | CQGN  | LLRIVS | RGNAT  | IAEVLRL | SAHIF  |

|                          |    |         |       |         |     |        |        |
|--------------------------|----|---------|-------|---------|-----|--------|--------|
|                          | 70 | 80      | 90    | 100     | 110 | 120    | 130    |
| Mus_musculus             | S  | KLEAKPE | LQDLD | EEFREN  | NI  | IVTRFY | LAFC   |
| Homo_sapiens             | S  | KLDAKPE | LQDLD | EEFREN  | NI  | IVTRFY | LAFC   |
| Xenopus_tropicalis       | G  | RLEAKPE | LQDLD | EEFREN  | NI  | IVTRFY | LAFC   |
| Danio_riero              | G  | RLEAKPE | LQDLD | EEFREN  | NI  | IVTRFY | LAFC   |
| Drosophila_melanogaster  | R  | RIEQSP  | LELTD | DEARQ   | L   | PLIVTR | FYLAFC |
| Caenorhabditis_elegans   | K  | ELSHLR  | LQ... | TFYAS   | T   | QPLVTR | FYLAFC |
| Capitella_sp             | N  | RIIQKAG | LEDDL | EEFKEN  | NI  | IVTRFY | LAFC   |
| Lottia_gigantea          | H  | RIESRVE | LQDLD | EEFSNH  | NI  | IVTRFY | LAFC   |
| Monosiga_brevicollis     | N  | KIDTNP  | LQDLD | EEQLRAS | Y   | MPVTRF | YNAFC  |
| Dictyostelium_discoideum | S  | KIEENAD | LVDLE | TEFRDN  | H   | ITLIVR | FYHIF  |

|                          |     |         |       |      |     |      |       |
|--------------------------|-----|---------|-------|------|-----|------|-------|
|                          | 140 | 150     | 160   | 170  | 180 | 190  | 200   |
| Mus_musculus             | L   | CEALYLY | GVMLL | VIDQ | KE  | GEV  | RRMLV |
| Homo_sapiens             | L   | CEALYLY | GVMLL | VIDQ | KE  | GEV  | RRMLV |
| Xenopus_tropicalis       | L   | CEALYLY | GVMLL | VIDQ | KE  | GEV  | RRMLV |
| Danio_riero              | L   | CEALYLY | GVMLL | VIDQ | KE  | GEV  | RRMLV |
| Drosophila_melanogaster  | L   | CEALYLY | GVMLL | VIDQ | KE  | GEV  | RRMLV |
| Caenorhabditis_elegans   | E   | AYCLYIS | GILII | YMDT | YI  | APIR | ERII  |
| Capitella_sp             | M   | SFALPI  | YGVML | TVDM | TKT | ED   | TRKML |
| Lottia_gigantea          | M   | CEALYLY | GVMLL | VIDQ | KE  | GEV  | RRMLV |
| Monosiga_brevicollis     | M   | EMLYLY  | GCMML | LLVD | MR  | IF   | GLVR  |
| Dictyostelium_discoideum | L   | SEAVYLY | GVMLL | IMD  | N   | LIF  | GEV   |

|                          |        |       |       |      |       |
|--------------------------|--------|-------|-------|------|-------|
|                          | 210    | 220   | 230   | 240  | 250   |
| Mus_musculus             | .....P | P     | NYP   | ESYF | ORV   |
| Homo_sapiens             | .....P | P     | NYP   | ESYF | ORV   |
| Xenopus_tropicalis       | .....P | P     | NYP   | ESYF | ORV   |
| Danio_riero              | .....P | P     | NYP   | ESYF | ORV   |
| Drosophila_melanogaster  | G      | LGGKQ | AGARA | ASLV | VPRYP |
| Caenorhabditis_elegans   | .....P | P     | NYP   | ESYF | ORV   |
| Capitella_sp             | .....P | P     | NYP   | ESYF | ORV   |
| Lottia_gigantea          | .....P | P     | NYP   | ESYF | ORV   |
| Monosiga_brevicollis     | .....P | P     | NYP   | ESYF | ORV   |
| Dictyostelium_discoideum | .....P | P     | NYP   | ESYF | ORV   |

|                          |     |       |     |     |     |      |     |
|--------------------------|-----|-------|-----|-----|-----|------|-----|
|                          | 260 | 270   | 280 | 290 | 300 | 310  | 320 |
| Mus_musculus             | Y   | VILYF | EP  | SIL | HT  | HQAK | MR  |
| Homo_sapiens             | Y   | VILYF | EP  | SIL | HT  | HQAK | MR  |
| Xenopus_tropicalis       | Y   | VILYF | EP  | SIL | HT  | HQAK | MR  |
| Danio_riero              | Y   | VILYF | EP  | SIL | HT  | HQAK | MR  |
| Drosophila_melanogaster  | Y   | VCLYF | EP  | SIL | HT  | HQAK | MR  |
| Caenorhabditis_elegans   | Y   | VILYF | EP  | SIL | HT  | HQAK | MR  |
| Capitella_sp             | Y   | VILYF | EP  | SIL | HT  | HQAK | MR  |
| Lottia_gigantea          | Y   | VILYF | EP  | SIL | HT  | HQAK | MR  |
| Monosiga_brevicollis     | Y   | VILYF | EP  | SIL | HT  | HQAK | MR  |
| Dictyostelium_discoideum | Y   | VILYF | EP  | SIL | HT  | HQAK | MR  |

|                          |     |       |      |       |      |        |     |
|--------------------------|-----|-------|------|-------|------|--------|-----|
|                          | 330 | 340   | 350  | 360   | 370  | 380    | 390 |
| Mus_musculus             | R   | YASV  | SDRV | RAQV  | QQF  | LKE    | G   |
| Homo_sapiens             | R   | YATV  | SERV | HAQV  | QQF  | LKE    | G   |
| Xenopus_tropicalis       | R   | YAKI  | IESL | HPQV  | QQF  | LKE    | G   |
| Danio_riero              | R   | YAAV  | SVTL | LRPQ  | VQQF | LKE    | G   |
| Drosophila_melanogaster  | Q   | KKEQL | GK   | ITQ   | KTQ  | EV     | IR  |
| Caenorhabditis_elegans   | K   | HKKMM | NETS | ..FPQ | INE  | .....M | IDE |
| Capitella_sp             | R   | YAAK  | CKQL | PLM   | LSQY | LKE    | G   |
| Lottia_gigantea          | R   | YAAK  | CKQL | PLM   | LSQY | LKE    | G   |
| Monosiga_brevicollis     | R   | YAL   | EAL  | PKL   | TKQ  | AGL    | L   |
| Dictyostelium_discoideum | R   | FWK   | EV   | SEL   | NKL  | VDDL   | L   |

|                          |     |      |     |       |     |     |     |
|--------------------------|-----|------|-----|-------|-----|-----|-----|
|                          | 400 | 410  | 420 | 430   | 440 | 450 | 460 |
| Mus_musculus             | R   | QIKD | QIL | TDSRY | N   | PKI | L   |
| Homo_sapiens             | R   | QIKD | QIL | TDSRY | N   | PKI | L   |
| Xenopus_tropicalis       | R   | QIKD | QIL | TDSRY | N   | PKI | L   |
| Danio_riero              | R   | QIKD | QIL | TDSRY | N   | PKI | L   |
| Drosophila_melanogaster  | G   | QVQK | V   | HELQ  | P   | N   | R   |
| Caenorhabditis_elegans   | R   | PLN  | KY  | R     | L   | P   | ..S |
| Capitella_sp             | K   | M    | L   | R     | E   | Q   | V   |
| Lottia_gigantea          | K   | L    | I   | R     | D   | O   | V   |
| Monosiga_brevicollis     | Q   | A    | A   | R     | E   | E   | I   |
| Dictyostelium_discoideum | K   | K    | F   | K     | D   | L   | V   |

|                          |     |     |     |     |     |     |     |
|--------------------------|-----|-----|-----|-----|-----|-----|-----|
|                          | 470 | 480 | 490 | 500 | 510 | 520 | 530 |
| Mus_musculus             | P   | L   | T   | R   | V   | E   | K   |
| Homo_sapiens             | P   | L   | T   | R   | V   | E   | K   |
| Xenopus_tropicalis       | P   | L   | T   | R   | V   | E   | K   |
| Danio_riero              | P   | L   | T   | R   | V   | E   | K   |
| Drosophila_melanogaster  | P   | L   | S   | K   | I   | E   | Q   |
| Caenorhabditis_elegans   | K   | M   | G   | E   | S   | O   | K   |
| Capitella_sp             | P   | L   | T   | R   | V   | E   | K   |
| Lottia_gigantea          | P   | L   | T   | R   | V   | E   | K   |
| Monosiga_brevicollis     | P   | L   | T   | R   | V   | E   | K   |
| Dictyostelium_discoideum | A   | L   | T   | R   | V   | K   | N   |



540 550 560 570 580 590 600

Mus\_musculus H QMIRTNIKEEVLITVQ IIG DLSFAWQLI D. SFTS IQES IRVNP SMVTK LRA TFLK LSA LD LPLLR I

Homo\_sapiens H QMIRTNIKEEVLITM Q IVG DLSFAWQLI D. SFTS IQES IRVNP SMVTK LRA TFLK LSA LD LPLLR I

Xenopus\_tropicalis H QMIRTNIKEEVLITM Q IVG DLSYAWQLI D. SFTS IQES IRANP SMVTK LRA TFLK LSA LD LPLLR I

Danio\_riero H QMIRTNIKEEVLITM Q IVG DLSYAWQLI D. SFTS IQES IRANP SMVTK LRA TFLK LSA LD LPLLR I

Drosophila\_melanogaster N QMAQLNLKEDI IHI MIT DFSYAWHL LQF DFT PPMQEH I KRQ PQA VIG ITRAVFLK LAST LE VPLMR I

Caenorhabditis\_elegans R ALMSVLSLSDSMI PEV YSKM ESTYLWPL IS. QLI PRI QONL VSTNT DV. VRQ IFTKLS IS CYMLK LKL

Capitella\_sp H QMIRVINVKEEVLIT I EIVADLAWH IVD. SYTPC MQSG I KRDP TLT VQ LRA TFLK LSA LD LPLLR I

Lottia\_gigantea H QMLRTNIKEEVLIT EIVADLSYAWH IVD. SYTGYM QQG I KKD PSLVI K LRA TFLK LSA LD LPLLR I

Monosiga\_brevicollis Q MIRTINIKDFLSVI SDVA DLSYAWH IVD. NYTGYM QAG I KQD PTLVI K LRA TFLK LSA LD LPLLR I

Dictyostelium\_discoideum T KMIKIVNIKEEVLV NLS VCA DMSYAWH IVD. NYVDQM QG I KSD PKCVL K LRA TFLK LSA LD LPLLR I

610 620 630 640 650 660

Mus\_musculus N QANSPDLLS. VSQYYSSELVSVYR KVLQI IPE SMT SLLK IIT KLO THD I M EV TRLD K KLRDYAQLG

Homo\_sapiens N QANSPDLLS. VSQYYSSELVSVYR KVLQI IPE SMT SLLK IIT KLO THD I I E V P TRLD K KLRDYAQLG

Xenopus\_tropicalis N QANSPDLLS. VSQYYSSELVSVYR KVLQI IPE SMT SLLK IIT KLO THD I I E V P TRLD K KLRDYAQLG

Danio\_riero N QVNSPDLLS. VSQYYSSELVAVYR KVLQI IPE SMT SLLK IIT KLO THD I I E V P TRLD K KLRDYAQLG

Drosophila\_melanogaster N QARSDELVS. VSNYSSELANLRRV LQIVPE TMS I LAK IIT YLL N VIK E F P T K V E K R L K D Y A Q F V

Caenorhabditis\_elegans S N F S K D H V A S R I A N T Y S Y A L E K N L K T V L Q S V P Q H L F G I M Y N V I M P G L K T F E . P Y I E K T E L R E L S E F V

Capitella\_sp N QANSPDLLS. VSQYYSSELVAVYR KVLQI IPE T M F T L L A K I I T F L Q T M K I T E V P T R L E K D K M R D Y A Q L D

Lottia\_gigantea N QAGSKDLMS. VSQYYSSELVSVYR KVLQI I P Q T M F S L L A S I T R L L N R I Q E V P T R L E K D K M K D F A Q L D

Monosiga\_brevicollis H QADSPLDFS. VSQYYSSELVSVYR R V L Q I I P R S M E I L A K V I A I R T R Q L K E V P T R L E K D Q L K E Y A Q L D

Dictyostelium\_discoideum A Q C S P D L I S . V S E Y Y S S E L V G V Y R K V L E I V P K Q M E I L I K Q I T N M Q T N N I Q E M P T K V E K E R L R D F A Q L D

670 680 690 700 710 720

Mus\_musculus P RYEVAKLTHAISIFTEGLMMKKTIVG I I K V D P K Q L E D G I R K E L V K R V A F A L H R G L I F . . . . . N

Homo\_sapiens P RYEVAKLTHAISIFTEGLMMKKTIVG I I K V D P K Q L E D G I R K E L V K R V A F A L H R G L I F . . . . . N

Xenopus\_tropicalis A R Y E V A K L T H A I S I F T E G L M M K K T I V G I I K V D P K Q L E D G I R K E L V K R V A Y A L H K G L I F . . . . . N

Danio\_riero A R Y E V A K L T H A I S I F T E G L M M K K T I V G I I Q V D P K Q L E D G I R K E L V K R V A Y A L H K G L I F . . . . . N

Drosophila\_melanogaster E R A K V A Q L T N S I A V F T G L M M K K T I V G I I Q V D P K Q L E D G I R K E L V N H A N A Y N L G L I F . . . . . T

Caenorhabditis\_elegans T N S R L V E T T S L I A N T S M G S R M M T T R V G T E I N P K B L L E G M I R Q L Y K B I K M I G T T S . . . . .

Capitella\_sp R R Y E V A K L T H A I S V F T E G L M M K K T I V G I I K I D P K Q L E D G I R K E L V K Q V A L A T H N G L I F . . . . . N

Lottia\_gigantea E R Y Q V A K L T H S I S V F T E G L M M K K T I V G I I K I D P K R L L E D G I R K E L V Q V A Y A L H K G I M F . . . . . N

Monosiga\_brevicollis L R Y E I A E L T Y Q I S V F T E G L M M K K T I V G I I K I D P K Q L E D G I R R E L V T Q V A R A L D E V T F . . . . . E

Dictyostelium\_discoideum Q R Y D L A R A T H S V S V F T E G I L A M E T I V G I I E V D P K Q L E D G I R K E L V L Q I A L A M D K T L I F S G K P Y Q A P S N

730 740 750 760 770 780 790

Mus\_musculus P . R A K . P S E L M . P K L K E L G A T M D G F H R S F E Y I Q D Y V S I Y G L K I W Q E E V S R I I N Y N V E Q E C N N F L R T K I Q D

Homo\_sapiens P . R A K . P S E L M . P K L K E L G A T M D G F H R S F E Y I Q D Y V N I Y G L K I W Q E E V S R I I N Y N V E Q E C N N F L R T K I Q D

Xenopus\_tropicalis S . R A K . P S E L L . P K L K D M A A T M D G F H R S F E Y I Q D Y V S I Y G L K I W Q E E V S R I V N Y N V E Q E C N N F L R T K I Q D

Danio\_riero P . K A K . P S E L M . P K L K E M A A T M D G F Y R S F E Y I Q D Y V S I Y G L K I W Q E E V S R I I N Y N V E Q E C N S F L R T K I Q D

Drosophila\_melanogaster P E K G K T P V Q L L Q Q K L Q A L A K T I E G Y R S F E Y I E D Y L R V Q G L R I L L E S Q R I I N Y N V E K E C N S F L R T K I Q D

Caenorhabditis\_elegans . . . . . A T S S I . E N L L K M C D N I E T M R C S F Y L C D Y M N L D G E H V S V A M . . . . . D D F . S R I S E

Capitella\_sp P . K A K . S E L S . S K L D T L G T M D G F H R S F E Y I Q D Y V S I Y G L K I W Q E E M S R I V N Y N V E Q E C N S F L R T K I Q D

Lottia\_gigantea P . K A K . V S E L L . P K L A T L G E Q M D G F H R S F E Y I Q D Y V N I Y G L K I W Q E E I S R I I Y N V E Q E C N S F L R T K I Q D

Monosiga\_brevicollis Q V K G K . M T D L H . E M L Q V R H R M L D G F H R S F E Y I Q D Y V D I Y G L R I W Q E E V S R I V N Y N V E Q E C N S F L R T K I Q D

Dictyostelium\_discoideum K Q Q Q . E I T E L L . Q R L K E L S N L D G F H R S F E Y I Q D Y V N I Y G L K I W Q E E F S R I V N Y N V E Q E C N S F L K K V Y D

800 810 820 830 840 850

Mus\_musculus W Q S M Y Q S T H I P I P K F A P V . . . . . S I T F I G R L C R E I L R I T D P K M T C Y I D Q L N T W Y D V K T . . . . . H Q E V T S

Homo\_sapiens W Q S M Y Q S T H I P I P K F T P V . . . . . S V T F I G R L C R E I L R I T D P K M T C H I D Q L N T W Y D M K T . . . . . H Q E V T S

Xenopus\_tropicalis W Q S M Y Q S T H I P I P K F P P V . . . . . S M T F I G R L C R E I L R I T D P K V T C Y I D Q M N T W Y D M K T . . . . . H Q E V T N

Danio\_riero W Q S V H Q S T H I P I P K Y P S V . . . . . S A T F I G R L C R E I L R I T D P K V T C Y I D Q L N T W Y D L R T . . . . . H Q E V T N

Drosophila\_melanogaster F Q S E H Q S Q I I P I P N F P P L L G D P . . . . . S N N F I G R L A H E I L R C T D P K Q T I F L D L K S T W Y E K A P H Q E V L A G

Caenorhabditis\_elegans E R A F A R S S G . . . . . E L . . . . . S K N Y I A E L . . . . . F I K T N P K A S R F S E S L S W K D V K M . . . . . S K T V L S

Capitella\_sp W Q S V Y Q S T A I P I P R F T P L . . . . . S V N F I G R I S K E I L R I T D P R T T T F I D R A S A W Y D G R T . . . . . K E B I I N

Lottia\_gigantea W Q S V Y Q S T A I P I P R F P P V . . . . . S V N F I G R L A R E I L R I T D S R T T I F I D M K A W Y D V K T . . . . . K Q E V A N

Monosiga\_brevicollis E E S I Y Q S R A I P I P R F Q P R . . . . . M S M N F V G R L A R E L L R L T N P S T T L Y L E R N T T W Y D I K T . . . . . K S B I V H

Dictyostelium\_discoideum W Q S Q Y Q S V A I P I P K F P S Q . . . . . S D Q N S Q Q S V N M I G R L A R E L L N Q T N C K T T L Y L N Q I G W F P S S . . . . . G K E L V G

860 870 880 890 900 910 920

Mus\_musculus S R L F S E I Q T T L G T F G L N G L D R L L C F M I V K E L Q N F L S M F Q K I I L K E R T V Q E T L K M M S A V N . . . . . P L K S I V

Homo\_sapiens S R L F S E I Q T T L G T F G L N G L D R L L C F M I V K E L Q N F L S M F Q K I I L R D R T V Q E T L K T L M N A V S . . . . . P L K S I V

Xenopus\_tropicalis N H L F S E I N D S L G T F G L N G L D R L L C F M I V K E L Q N F I R L Y Q R S I L R D K S G Q E T L R A L Q K V T . . . . . P V K G I V

Danio\_riero N R L F S E I Q D T L G T F G L N G L D R L L C F M I V K E L Q N F L T V L Q K S I L K D K A V Y D V F K A L L T A V N . . . . . P V K G I V

Drosophila\_melanogaster S G F F E I L R E A L A P A G M V G L E R L Y A H M L A D E K R N L R L Q R N L T S D R M W V D T L A A L T R E L E A R D F P T P E V S

Caenorhabditis\_elegans F D V F D R I E K I V P F H I L T S E T H I V T L E K M L E Y I S N A R K . . . . . I G V S F N Q S N T . . . . . H E S A F Q

Capitella\_sp I K V F S K L E K S V G S L G S G L D R L L C F M I V Q D Q D F G V M L S K T L F A D K T V E F F S K F G R D L Q . . . . . P T S G L I

Lottia\_gigantea R T L F Q Q I H R A V G S F G L S G L D R L L C F M I V K E L Q R F Q L N L Q R G V I R D K S W L E F F S L T T K L Q . . . . . P L Q G T V

Monosiga\_brevicollis A D T F Q R L L E A L D T F G L A G L D K L C F M I V H E L Q R F E R T W Q R Q L . . . . . K Q I V P A L K S L S T T L Q . . . . . P L A A P P

Dictyostelium\_discoideum I N T W S I L H Q S V G I F G L T G L D K L F S P M M V K D L Q V F V S Q T R S L V . . . . . E K S L G K F L N E F E D Y L R . . . . . P T N I P

930 940 950 960 970 980 990

Mus\_musculus A N S S K V Y L S A I T T Q K I W S A Y L E A T M K V G Q M O I L R Q O T A N E L N S C R F D S R H L A A A L D N L N K A L L A D I E A

Homo\_sapiens A N S N K I Y F S A I A K T Q K I W T A Y L E A T M K V G Q M O I L R Q O T A N E L N Y S C R F D S K H L A A A L E N L N K A L L A D I E A

Xenopus\_tropicalis A N S A K I Y S A A I A K T Q K I W P A Y L D A I M K V G Q M O V L R Q O T A N E L N Y S C K F D S K H L A G A L E N F N E A I L A D I Q A

Danio\_riero A N A S K V T N A A A K T Q K I W S P Y L E A T M K V G Q M O I L R Q O T A N E L N Y S C K F D S K H L A A L E N L N K S L L S D I E A

Drosophila\_melanogaster K Q P L K Y Q A Y T Q R W L K V W P T L D W V L C I G Q R L L R E T A G E L S F S S K C D A K L E N T A D T L N K A L L L S L S L

Caenorhabditis\_elegans F F T G P N Y E R L V K S I Q P Q S A A L A A T L A Q I G Y L I L R T I C N A K Q L A N R H K E D S I Q R D L I E M S I S M A R D . . . . .

Capitella\_sp S N P H K M X A Q A I S K A N K L W R P F L D V V L K V G M Q L L R R I T A A Q L K N S S K F P S K F A M S L Q I T F N S A L L T I E R

Lottia\_gigantea N Q P Q K V Y S Q A V S K T V K L W P V Y L D V I L R V G M Q L L R R O T A Y E L N T S C K F D S K F L A S S L Q T V N R A L L A D I E K

Monosiga\_brevicollis A T T A . V Y A T G I Q Q L S K V F F I A N V V F K V G H I Q L L R R M I T A Q L N S A A K F D G K L L L A S V S K V N Q A L L A B I E T

Dictyostelium\_discoideum D T M I R . Y Q A L D K T K L L Y P I F I D V L T K I G Q I Q L I R R O T S N Q L N F H C K I D S N M L F S S L D I M N K S L L N D I E S

1000 1010 1020 1030 1040 1050 1060

Mus\_musculus H Y R D P . S L P Y P K E D N T L L Y . E I T A Y L E A A G T H N P L N K I Y I T T K R L P Y P I V N F L F L I A Q L P K L Q Y N K N L G

Homo\_sapiens H Y Q D P . S L P Y P K E D N T L L Y . E I T A Y L E A A G T H N P L N K I Y I T T K R L P Y P I V N F L F L I A Q L P K L Q Y N K N L G

Xenopus\_tropicalis H Y Q D P . S L P C P R E D N T L L Y . E I T A Y L E A A G T H N P L N K I Y I T T K Q L S F P I V N F L F L V A Q L P K L Q Y N K N L G

Danio\_riero H Y Q D P . S L P Y P K E D N T L L Y . E I T A Y L E A A G T H N P L N K I Y I T T K R L P Y P I V N F L F L I A Q L P K L Q Y N K N L G

Drosophila\_melanogaster . . . . . S K D L C D E K G V M L T . E I Q E T L L Y T G N F E P L E Q V F L I T K N T H N M A L F M F T P I A H L G R M Q H S T I D

Caenorhabditis\_elegans . . . . . P T D L P T E M G T I L K . L M M Q Y . . . . . S L Y D P E R M I F . . . . . R L K D E P S P L F I A L V O . . . . .

Capitella\_sp H Y Q D P . S L P Y P S D E N P L M F . E M T S Y L E S S G L N N P F S K I Y V T T K M M L Y F S I C C F L N F V I S Q L P K L S Y V K S G V

Lottia\_gigantea H Y Q D P . T Q P Y P K E E N P L M Y . E L T A Y L E S S G H N P L D K I Y I T T M R V P F P L F N Y F L V L S Q L P K L V Y N K S V S

Monosiga\_brevicollis H Y R D P . S K P F P G D T L L L P . E L S A Y S E A V G A D P L Q K I Y V T T K L D E I A S L L F P F L S Q L Q R F S F A R Q L

Dictyostelium\_discoideum H F Q R P D S N P Y P S D D N T L L P . D L A O Y L D T A G N D P E T R I Y I T T S P L E Q P A C L L F P F L S Q L S R K F Q P N S K L N

|                          | 1070 | 1080      | 1090      | 1100      | 1110      | 1120     |         |         |       |       |       |         |          |        |    |    |
|--------------------------|------|-----------|-----------|-----------|-----------|----------|---------|---------|-------|-------|-------|---------|----------|--------|----|----|
| Mus_musculus             | .MVC | CRKPADPVD | WPP..LVL  | GLLTLTKQ  | FHSRYTEQ  | FLALIGQ  | FIRSTME | QC..... | TSQ   | KMP   | EMPA  | DA      |          |        |    |    |
| Homo_sapiens             | .MVC | CRKPTDPVD | WPP..LVL  | GLLTLTKQ  | FHSRYTEQ  | FLALIGQ  | FIRSTME | QC..... | TSQ   | KIPE  | IPAD  | DV      |          |        |    |    |
| Xenopus_tropicalis       | .MT  | CRKPADPI  | DWVP..LVL | GLLTLTKQ  | FHSRYTEQ  | FLALIGQ  | FIRSTME | QC..... | TSQ   | KIPE  | MPAD  | DV      |          |        |    |    |
| Danio_rerio              | .MA  | CRKPADAL  | DWAP..LVL | GLLTLTKQ  | FHSRYTEQ  | FLALIGQ  | FIRSTME | QC..... | TSQ   | KIPD  | MPS   | DV      |          |        |    |    |
| Drosophila_melanogaster  | CLL  | PKSAKDN   | INVP..FIV | GLVTLIQ   | FHKNFKML  | YISYMSQ  | YVVTVSE | A.....  | QLD   | KEIL  | GP    | EV      |          |        |    |    |
| Caenorhabditis_elegans   | CLL  | PK.IGD    | PYFVCPKQ  | LEV       | GIRFVLRQ  | .....SR  | LLPYFL  | PIREQLF | ..... | QSR   | PKRV  | DV      |          |        |    |    |
| Capitella_sp             | ELL  | PKASDHL   | DMS..FV   | VGAITLTKQ | FHSDNTDL  | FLI      | EYLA    | YVRS    | HME   | ..... | SS    | KPTELSG | DV       |        |    |    |
| Lottia_gigantea          | SLV  | SKKPEHL   | DAPS..FT  | IGVTLTKQ  | FHADNTNF  | FLA      | FLGQ    | YIRSC   | VE    | AM    | ..... | SS      | KSPELSQ  | DV     |    |    |
| Monosiga_brevicollis     | TLV  | SRKQGD    | DDV       | GTV..FI   | AGLITLTKQ | FHSHQLS  | FQGMFA  | CHVRA   | QIQ   | T     | ..... | VD      | PKSPTLSA | DA     |    |    |
| Dictyostelium_discoideum | VMS  | SKKQKNS   | YD        | WTP..FI   | IGCITLTKQ | FHSLHTQK | FL      | AFVGQ   | YLS   | HIN   | I     | ALANPKE | NN       | KDDADY | PE | DV |

  

|                          | 1130 | 1140 | 1150 |   |                                    |   |   |   |   |   |   |   |   |   |   |   |   |   |   |   |   |   |   |   |   |   |   |   |   |   |   |   |   |       |   |   |   |       |       |
|--------------------------|------|------|------|---|------------------------------------|---|---|---|---|---|---|---|---|---|---|---|---|---|---|---|---|---|---|---|---|---|---|---|---|---|---|---|---|-------|---|---|---|-------|-------|
| Mus_musculus             | V    | GAL  | LF   | E | DYVRYTKLPRRVAEAHVNFIFDEFRTVL...    |   |   |   |   |   |   |   |   |   |   |   |   |   |   |   |   |   |   |   |   |   |   |   |   |   |   |   |   |       |   |   |   |       |       |
| Homo_sapiens             | V    | GAL  | LF   | E | DYVRYTKLPRRVAEAHVNFIFDEFRTVL...    |   |   |   |   |   |   |   |   |   |   |   |   |   |   |   |   |   |   |   |   |   |   |   |   |   |   |   |   |       |   |   |   |       |       |
| Xenopus_tropicalis       | V    | GAL  | MF   | E | DYVHFVAKLPRRVVEAHVNFIFDEFRTIQ...   |   |   |   |   |   |   |   |   |   |   |   |   |   |   |   |   |   |   |   |   |   |   |   |   |   |   |   |   |       |   |   |   |       |       |
| Danio_rerio              | V    | GAL  | MF   | E | DYVRYTKLPRKVAEAHVPSFIFDEFRTVL...   |   |   |   |   |   |   |   |   |   |   |   |   |   |   |   |   |   |   |   |   |   |   |   |   |   |   |   |   |       |   |   |   |       |       |
| Drosophila_melanogaster  | V    | TAL  | H    | F | LAFIRIARLPLGVLEQRIPNIILSEYEYLSLTLK |   |   |   |   |   |   |   |   |   |   |   |   |   |   |   |   |   |   |   |   |   |   |   |   |   |   |   |   |       |   |   |   |       |       |
| Caenorhabditis_elegans   | D    | R    | F    | I | RHLISNL.....                       |   |   |   |   |   |   |   |   |   |   |   |   |   |   |   |   |   |   |   |   |   |   |   |   |   |   |   |   |       |   |   |   |       |       |
| Capitella_sp             | V    | T    | C    | L | I                                  | F | E | E | F | V | Q | F | S | G | I | S | R | K | I | V | E | A | H | I | P | T | Y | I | L | D | E | F | K | A     | Q | A | F | Q     | ..... |
| Lottia_gigantea          | L    | N    | V    | L | F                                  | L | E | D | Y | I | F | Y | N | R | L | P | R | K | S | V | E | S | F | I | P | S | Y | I | F | D | E | F | R | S     | Q | Y | A | ..... |       |
| Monosiga_brevicollis     | I    | N    | S    | L | V                                  | F | L | E | E | M | A | Q | Y | C | K | T | S | R | A | T | L | M | T | N | L | P | P | Y | I | V | D | E | F | R     | R | Q | T | ..... |       |
| Dictyostelium_discoideum | I    | G    | L    | R | F                                  | L | E | D | F | C | K | Y | S | H | T | S | R | K | I | V | E | G | Y | V | P | P | Y | I | F | D | Y | Y | N | ..... |   |   |   |       |       |

### Supplementary figure 5. Alignment of Strumpellin orthologs.

Sequences were aligned using MUSCLE (<http://www.drive5.com/muscle/>), and the alignment was rendered using ESPript (<http://esprict.ibcp.fr/ESPrict/ESPrict/>).

|                          |         |           |             |                  |              |           |           |            |
|--------------------------|---------|-----------|-------------|------------------|--------------|-----------|-----------|------------|
|                          | 1       | 10        | 20          | 30               | 40           | 50        | 60        | 70         |
| Mus_musculus             | MTPVK   | TQCSLAGLI | YAVPLIQPDLR | REEAVIQVADAOYIQN | ISGDIFSRISRV | ELSRRLQAI | ISEFRVS   |            |
| Homo_sapiens             | MTPVR   | MQHSLAGQT | YAVPLIQPDLR | REEAVIQVADAOYIQN | ISGDIFSRISRV | ELSRRLQAI | ISEFRVS   |            |
| Xenopus_tropicalis       | ...MPQ  | NRSMESQAT | YSLPLIQPDLR | REEAVIQVADAOYIQN | ISGDIFSRISRV | ELSRRLQAI | ISEFRVS   |            |
| Danio_riero              | MVRMT   | QKRYLEGQV | YSVPLIQPDLR | REEAVIQVADAOYIQN | ISGDIFSRISRV | ELSRRLQAI | ISEFRVS   |            |
| Drosophila_melanogaster  | ...MEES | SPYLHSP   | YQVATIQPDLR | REEAVIQVADAOYIQN | ISGDIFSRISRV | ELSRRLQAI | ISEFRVS   |            |
| Caenorhabditis_elegans   | ...YHVP | LIQRD     | AGREETIFRIN | QSTQKLLRV        | SDIFDRVEHR   | ITR       | IHGKABADR | RTTE       |
| Capitella_sp             | ...MKIN | DMSDKP    | YNVAVMPPDLR | REEETIKQICD      | AGYLDQITL    | LDIFARVS  | QRITD     | NHSLKAVNDR |
| Lottia_gigantea          | ...YHVP | LIQRD     | AGREETIFRIN | QSTQKLLRV        | SDIFDRVEHR   | ITR       | IHGKABADR | RTTE       |
| Monosiga_brevicollis     | ...CVYH | VVPAHL    | REEESLQMLD  | ADAEYLSA         | TVDDIF       | GKITTS    | VNAN      | KERLVAVN   |
| Dictyostelium_discoideum | ...MTTQ | IYQVPLV   | SNGLR       | ETESI            | LQIVDS       | EKLEKVF   | NDMYS     | TISARV     |

|                          |               |              |          |           |          |                       |
|--------------------------|---------------|--------------|----------|-----------|----------|-----------------------|
|                          | 80            | 90           | 100      | 110       | 120      | 130                   |
| Mus_musculus             | LAQAKIEKIKGSK | KAIKVFSS     | AKYPA    | PEHLQEYGS | SIF      | TGALD...PGLQRRPRYR    |
| Homo_sapiens             | LAQAKIEKIKGSK | KAIKVFSS     | AKYPA    | PERLQEYGS | SIF      | TGAQD...PGLQRRSRHR    |
| Xenopus_tropicalis       | LAQAKIERLKGIK | KAIKVFSS     | AKYPA    | PERLQEYGS | SVF      | AGAED...GWLAKKLRHK    |
| Danio_riero              | LAQARVKIKGSK  | KAIKVFSS     | AKYPA    | PEHLQDYS  | SIF      | TGAVD...PASQRRPRIK    |
| Drosophila_melanogaster  | RAQAKIDALVGS  | KRAIITFAP    | ARLP     | SDVLAPLP  | ATF      | PQVAANPLMEQ           |
| Caenorhabditis_elegans   | VLEKLES       | SLQESDKVITFL | RLPQLPK  | LPEEPTST  | SLF      | RINIDTEHPG            |
| Capitella_sp             | LAAAKISLKGSK  | KATKVFSS     | AKYPA    | DADGIPFM  | SVY      | QDVDEK...LKKVQHSYK    |
| Lottia_gigantea          | LAAAKISLKGSK  | KATKVFSS     | AKYPA    | DADGIPFM  | SVY      | QDVDEK...LKKVQHSYK    |
| Monosiga_brevicollis     | TANA          | KVQKIVGTR    | RATTVFCS | AKYPA     | DDKLDYPO | ALFQESHG...PGFVE...HS |
| Dictyostelium_discoideum | NAQ           | HKVNQIVGSK   | QAIVT    | FSSAKYPA  | DKKWGDYV | PTYS                  |

|                          |              |          |            |            |         |
|--------------------------|--------------|----------|------------|------------|---------|
|                          | 140          | 150      | 160        | 170        | 180     |
| Mus_musculus             | ALQEK...KYF  | FPVCVNT  | KS...EPEDA | E...GLGGL  | LPS.NT  |
| Homo_sapiens             | ALQEK...KYF  | FPVCVNT  | KS...EPEDA | E...GLGGL  | LPS.NT  |
| Xenopus_tropicalis       | AVQEK...KYF  | FPVCVNT  | RG...EDESA | E...GLGGL  | LPS.NT  |
| Danio_riero              | AQQEK...MYLP | FPVCVNT  | KS...RSEDE | E...GLGGL  | LPS.NT  |
| Drosophila_melanogaster  | PDDAD...FHH  | VVRGDR   | Q...ESPLVA | RKI        | TNR     |
| Caenorhabditis_elegans   | DFTYE        | NKPKDF   | FLTSQV     | LKE...YEQK | GWERY   |
| Capitella_sp             | VCQEK...QYV  | NVQLKAKR | S          | RKQ        | KENDG   |
| Lottia_gigantea          | VFRDK...QYV  | NVHLN    | VKK...RARD | GNN        | E       |
| Monosiga_brevicollis     | VDRDR...YNF  | KSNTIR   | RER        | GAD        | PEE     |
| Dictyostelium_discoideum | PEDSY        | LDVNDL   | VIE        | KSID       | T...SKE |

|                          |            |          |         |            |             |
|--------------------------|------------|----------|---------|------------|-------------|
|                          | 190        | 200      | 210     | 220        | 230         |
| Mus_musculus             | KKYV...FLD | PLAGAVTK | HTMLG   | TE...EEK   | FDFA...PLS  |
| Homo_sapiens             | KKYV...FLD | PLAGAVTK | HTMLG   | TE...EEK   | FDFA...PLS  |
| Xenopus_tropicalis       | KKYV...FLD | PLAGAVTK | HTMLG   | TE...EEK   | FDFA...PLS  |
| Danio_riero              | KKYV...FLD | PLAGAVTK | HTMLG   | TE...EEK   | FDFA...PLS  |
| Drosophila_melanogaster  | GEDL       | NARKRS   | LPPONAR | VASQST     | ITLGT...EKQ |
| Caenorhabditis_elegans   | GDFS...KKA | LDAADD   | GGTSRS  | GRTT       | DEL...AQLR  |
| Capitella_sp             | KKYV...MLD | PLGVT    | KVRS    | LDEE...DSG | LAE...PST   |
| Lottia_gigantea          | KKYV...MLD | PLGVT    | KVRS    | LDEE...DSG | LAE...PST   |
| Monosiga_brevicollis     | KKYT...LVD | PLRGT    | VTRT    | RDVDE...EQ | LAD...PKT   |
| Dictyostelium_discoideum | KYS...NT   | LDNL     | SGD     | GGDD       | YITFGD      |

|                          |             |         |         |         |        |                 |
|--------------------------|-------------|---------|---------|---------|--------|-----------------|
|                          | 240         | 250     | 260     | 270     | 280    | 290             |
| Mus_musculus             | VVDLGQVPEID | VPSYLPD | PLGAVAD | DLMSAD  | LGPGIA | PSAPGA..IPB     |
| Homo_sapiens             | VVDLGQVPEID | VPSYLPD | PLGAVAD | DLMSAD  | LGPGIA | PSAPGT..IPB     |
| Xenopus_tropicalis       | VVDLGQVPEID | VPSYLPD | PLGAVAD | DLMSAD  | LGPGIA | PSAPGV..IPB     |
| Danio_riero              | VVDLGQVPEID | VPSYLPD | PLGAVAD | DLMSAD  | LGPGIA | PSVPASNS        |
| Drosophila_melanogaster  | NPAAL       | AAPAI   | VLDL    | PLGAVAD | DLMSAD | LGPGIA          |
| Caenorhabditis_elegans   | EKKKK       | TAKMVE  | MDSD    | LPNPK   | GHAHDF | TLRD...PEI      |
| Capitella_sp             | IPGL        | GEVPEI  | VPEF    | LPDLAG  | VADL   | SYSD...MPL      |
| Lottia_gigantea          | MFDI        | GEVPEI  | VPEF    | LPDLAG  | VADL   | SYSD...MPL      |
| Monosiga_brevicollis     | KFGM        | AVPTI   | DAPAF   | LPDQ    | GVAD   | LAFVVE...NSASIA |
| Dictyostelium_discoideum | EGT         | FIPVY   | NPSIS   | LP      | LNVA   | ENTWA...SQSIA   |

|                          |                 |            |           |          |          |
|--------------------------|-----------------|------------|-----------|----------|----------|
|                          | 300             | 310        | 320       | 330      | 340      |
| Mus_musculus             | LQPELENE...VLLA | APPPPP...P | PPPPP...P | APTALV   | STPQPPMF |
| Homo_sapiens             | LKADLQDG...VLLA | APPPPP...P | PPPPP...P | APVFLASA | SPLP     |
| Xenopus_tropicalis       | SRTDSQDG...RLLP | PPPPPP...P | PPPPP...P | PEPSVLS  | PPPTSLAP |
| Danio_riero              | SGSDSQF...KLEA  | PPPPPP...P | PPPPP...P | THVPVPP  | PPPTSAAP |
| Drosophila_melanogaster  | QAI             | AAQTHIP    | GGVRRK    | SVQC     | PPSPTAA  |
| Caenorhabditis_elegans   | TEAEADAP...TTFL | PPPPPP...P | PPPPP...P | VEITE    | IPPI     |
| Capitella_sp             | SGPADLGS...SSAP | PPPPPP...P | PPPPP...P | PADV     | PPPPPP   |
| Lottia_gigantea          | SGPAEL          | PGVVLD     | VSGPPPP   | PPPPPP   | PPPPPP   |
| Monosiga_brevicollis     | DQTVT           | QAAAPAS    | APTSS     | APPPPP   | PPSGAA   |
| Dictyostelium_discoideum | NNVNN           | NNNNNN     | NNSTG     | TMQP     | POPT     |

|                          |             |                |              |        |         |         |
|--------------------------|-------------|----------------|--------------|--------|---------|---------|
|                          | 350         | 360            | 370          | 380    | 390     | 400     |
| Mus_musculus             | SSSSMAHTASV | QGAPKE..VVD    | PPSSG        | RATL   | LESIRQ  | AGGIGK  |
| Homo_sapiens             | SSSSA..SPSV | QGAPRE..VVD    | PPSSG        | RATL   | LESIRQ  | AGGIGK  |
| Xenopus_tropicalis       | VGDP...GSLQ | GAPKE..VVN     | PPSDG        | RASL   | LESIRQ  | AGGIGK  |
| Danio_riero              | ASSPAPT     | GTVKGAPSE..VVQ | PPSNG        | RASL   | LESIRN  | AGGIGK  |
| Drosophila_melanogaster  | PLSP        | LATPLN         | MPQPPP...ATE | DRSE   | LMAAIR  | NAAGGV  |
| Caenorhabditis_elegans   | ...SSSV     | TFSPTK...SVD   | GGRS         | LMAAIR | NAAGG   | AGKLS   |
| Capitella_sp             | ...APQA     | QPPKERA        | ENPDAG       | RSSL   | LMAAIR  | NAAGG   |
| Lottia_gigantea          | ...SIQI     | QDAPPE..VSAP   | SDGR         | RASL   | LD      | SI      |
| Monosiga_brevicollis     | ...TLAV     | DDVSD          | GGGGG        | GDARND | LASIRRN | ...NKAN |
| Dictyostelium_discoideum | DDDDDD      | NGG...GGG      | GGGA         | IGD    | L       | LAD     |

|                          |              |              |        |        |
|--------------------------|--------------|--------------|--------|--------|
|                          | 410          | 420          | 430    | 440    |
| Mus_musculus             | .QKEQE...QVR | ATSG...GDI   | MSDL   | FNKLV  |
| Homo_sapiens             | .QKEQE...QVR | ATSG...GDI   | MSDL   | FNKLV  |
| Xenopus_tropicalis       | .MKEQE...QVR | ATSG...GDI   | MSDL   | FNKLV  |
| Danio_riero              | .QKEQE...QVQ | ATVSG...GDI  | MSDL   | FNKLV  |
| Drosophila_melanogaster  | ...NSR       | SKACG        | AVTGD  | MSDL   |
| Caenorhabditis_elegans   | ...SSSV      | TFSPTK...SVD | GGRS   | LMAAIR |
| Capitella_sp             | ...APQA      | QPPKERA      | ENPDAG | RSSL   |
| Lottia_gigantea          | ...SIQI      | QDAPPE..VSAP | SDGR   | RASL   |
| Monosiga_brevicollis     | ...TLAV      | DDVSD        | GGGGG  | GDARND |
| Dictyostelium_discoideum | DDDDDD       | NGG...GGG    | GGGA   | IGD    |

```

                                450      460      470
Mus_musculus      .....GGAFSRMSDSIPPLPPPQ.....QPAGDEDEDWES
Homo_sapiens      .....GGAFARVSDSIPPLPPPQ.....QPQAEDEDDWES
Xenopus_tropicalis.....TGAFARISDTIPPLPPP.....QASGDGEDDWES
Danio_rerio       .....SSGSFARMSDVIPLPAPQ.....QSAAD.DEDDWEA
Drosophila_melanogaster.....MQQLSRVIPPVQPRKGSKSSDEHSEDDEGWN.
Caenorhabditis_elegans.....AKVSSTIPAPP.....NFDDEEWD.
Capitella_sp      .....SNPMDRISAMIPPPS.....RETSEAPDEEWEE
Lottia_gigantea   .....GGGSAMDKISSMIPAPPEPSE.....DASAGGDDDDWD.
Monosiga_brevicollis.....DEDDRPAAPPPLKTGNSMMDNLAAMIPQLPPGS.....DDDGGDDGDDWD.
Dictyostelium_discoideum.....DTDDQ.....DGESDTSSEWE.

```

**Supplementary figure 6. Alignment of WASH Orthologs.**

Sequences were aligned using MUSCLE (<http://www.drive5.com/muscle/>), and the alignment was rendered using ESPript (<http://esprict.ibcp.fr/ESPript/ESPript/>).



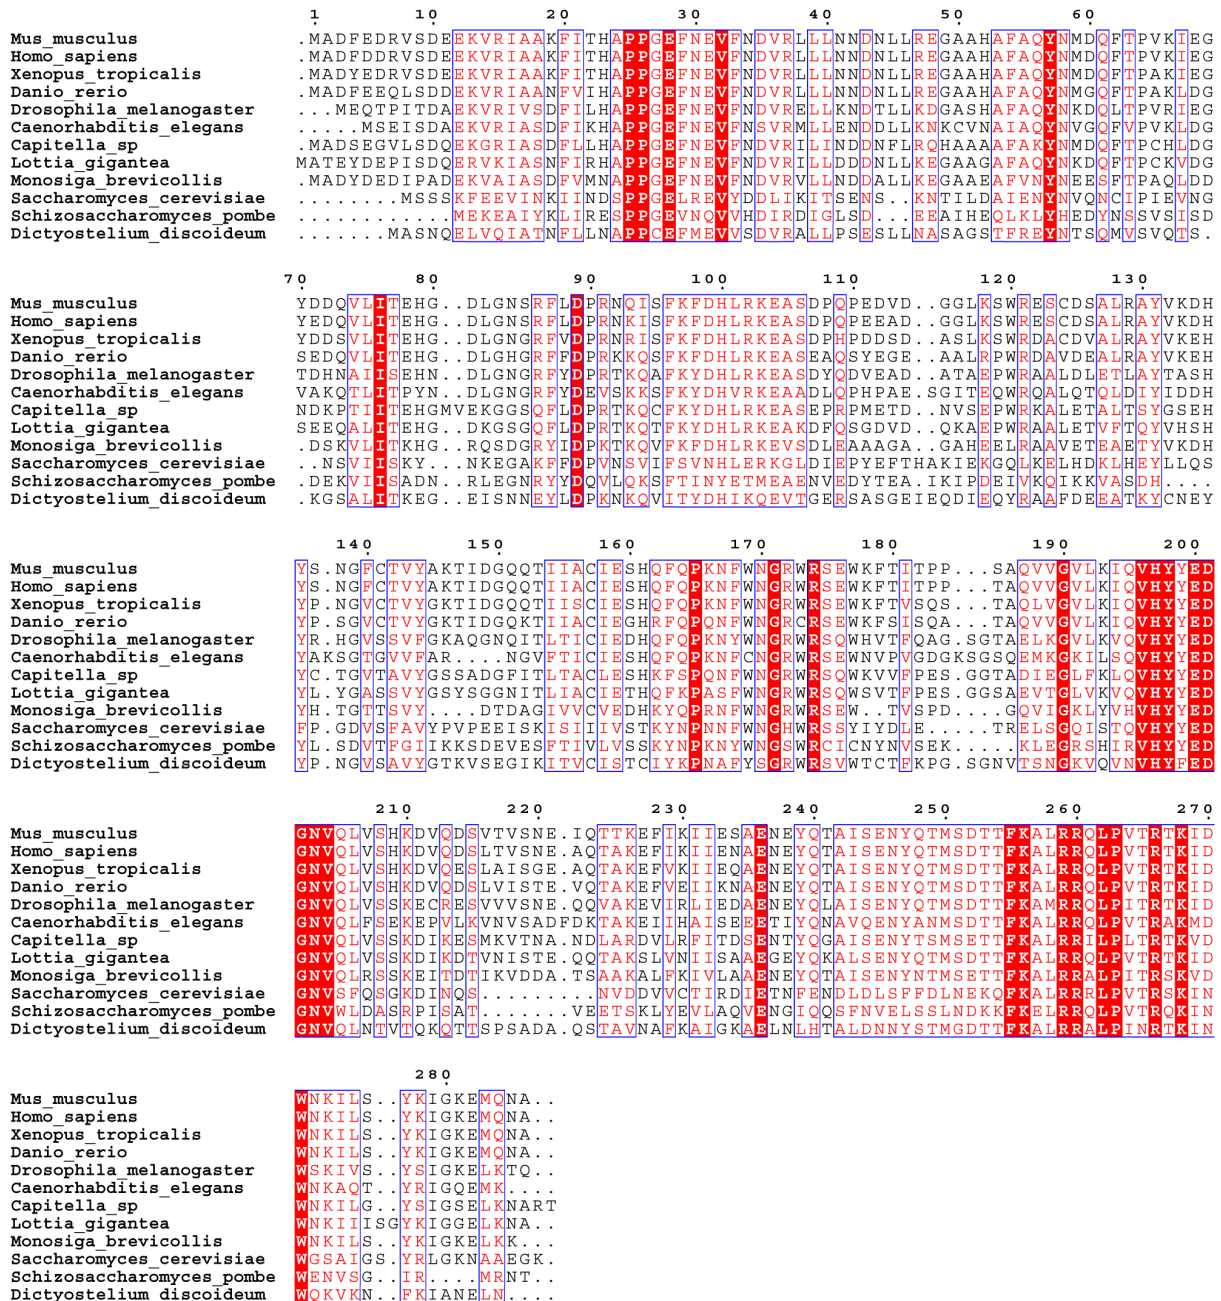

### Supplementary figure 7. Alignment of CapZ $\alpha$ Orthologs.

Sequences were aligned using MUSCLE (<http://www.drive5.com/muscle/>), and the alignment was rendered using ESPrnt (<http://esprnt.ibcp.fr/ESPrnt/ESPrnt/>).

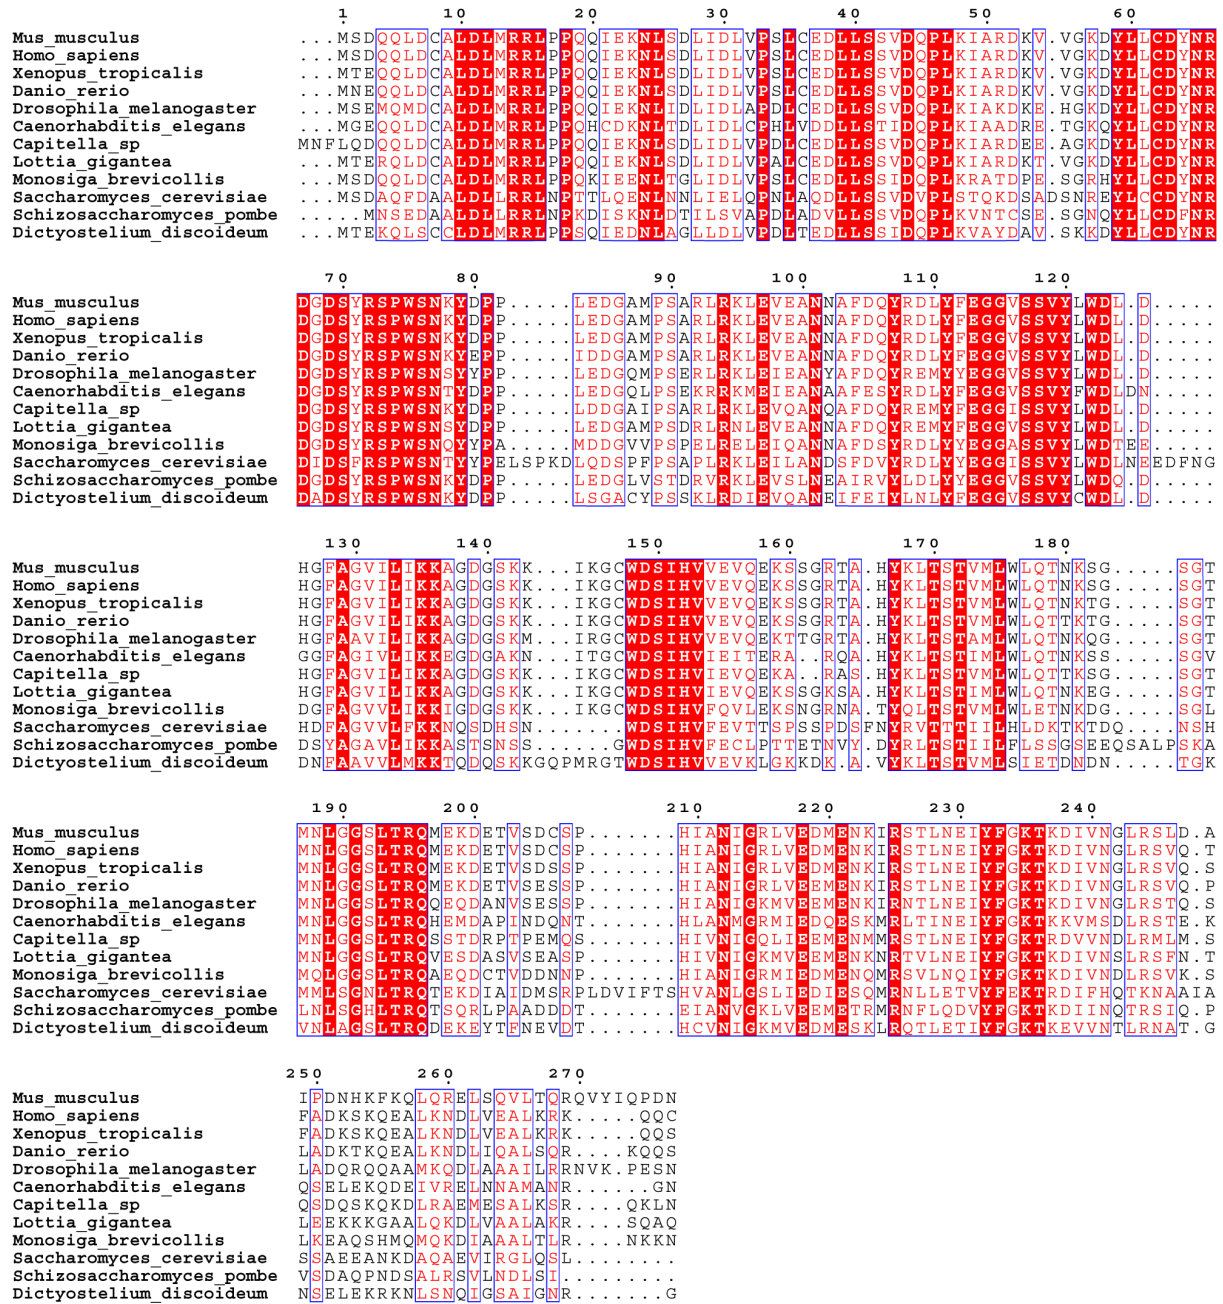

### Supplementary figure 8. Alignment of CapZ $\beta$ Orthologs.

Sequences were aligned using MUSCLE (<http://www.drive5.com/muscle/>), and the alignment was rendered using ESPrnt (<http://esprnt.ibcp.fr/ESPrnt/ESPrnt/>).

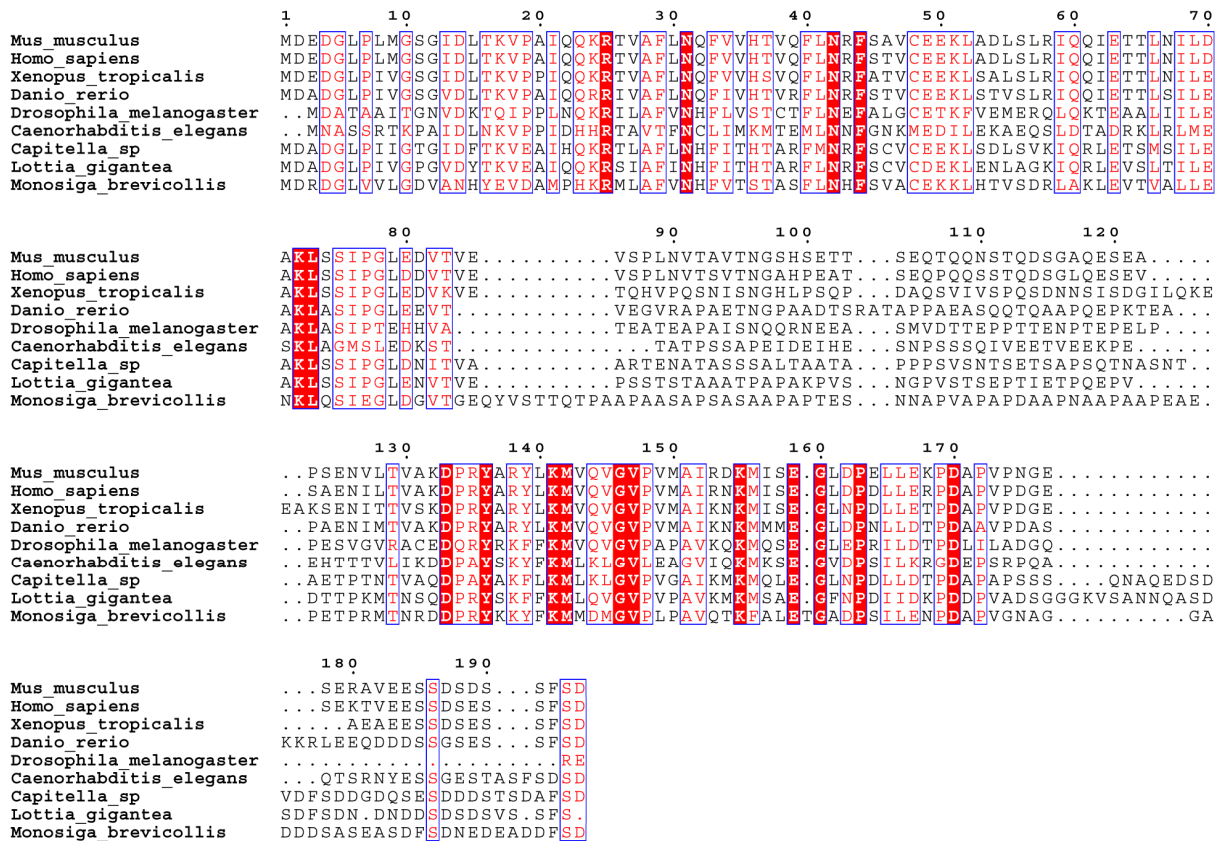

### Supplementary Figure 9. Alignment of Ccdc53 Orthologs.

Sequences were aligned using MUSCLE (<http://www.drive5.com/muscle/>), and the alignment was rendered using ESPrnt (<http://esprnt.ibcp.fr/ESPrnt/ESPrnt/>).
